# Supplementary material
Source: PubMed Central journal article supplement (PMC6084638)
Supplement: mmc1.pdf [file mmc1.pdf]

**Biophysical Journal, Volume 115**

**Supplemental Information**

**A Database of Predicted Binding Sites for Cholesterol on Membrane  
Proteins, Deep in the Membrane**

**Anthony G. Lee**

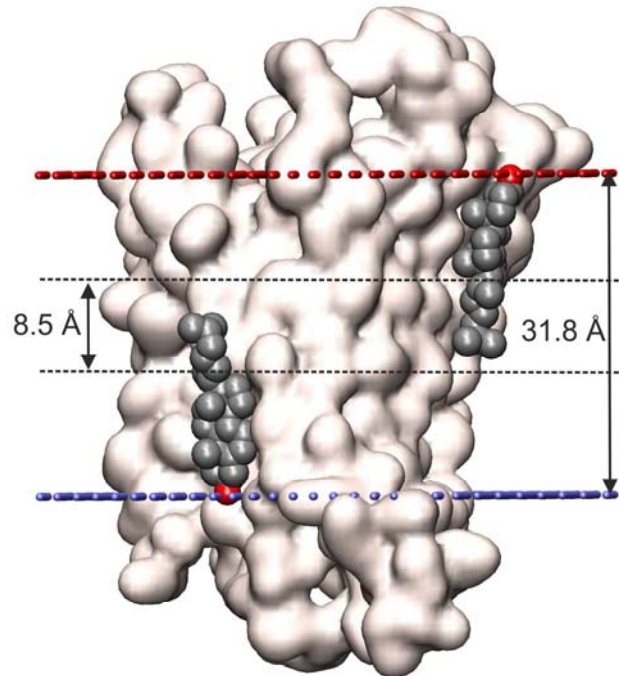

FIGURE S1 Cholesterol molecules in the crystal structure of human purinergic G protein coupled receptor P2Y<sub>12</sub>. The protein surface (PDB code 4NTJ) is shown together with its hydrophobic domain of thickness 31.8 Å as predicted by the OPM database; the EC and IC surfaces are shown in red and blue, respectively. The two resolved cholesterol molecules are shown in space-fill format with oxygen atoms in red. The ends of the two cholesterol rings are separated by 8.5 Å.

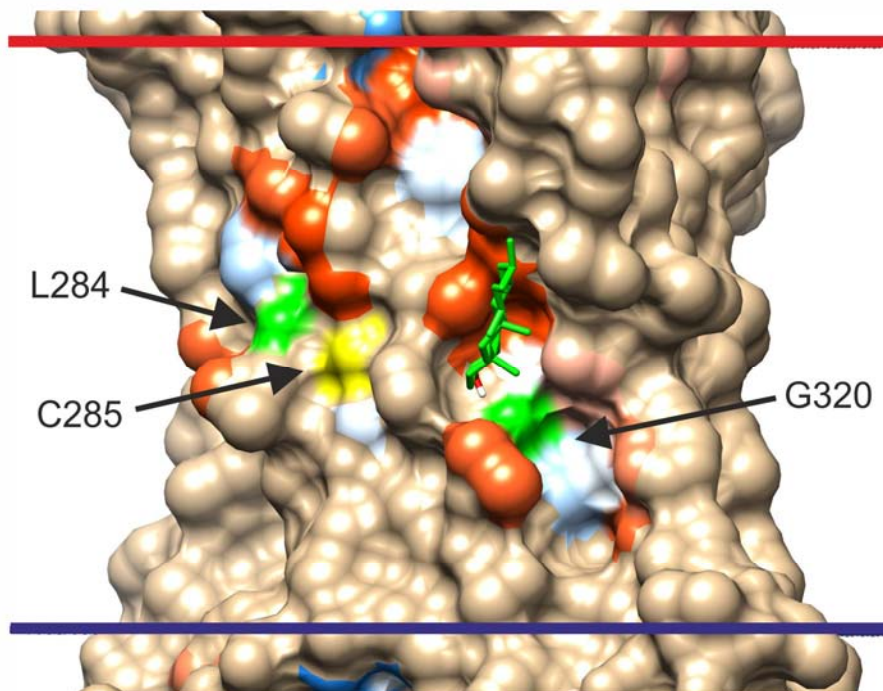

FIGURE S2 The membrane spanning surface of the agonist-free  $\beta_2$  adrenergic receptor [PDB file 3D4S] with the surface pockets identified using CASTp, coloured from the most hydrophobic (orange) to the most hydrophilic (blue). The most energetically favourable of the cholesterol molecules bound to Gly320 is shown in stick format (light green for carbons and red for oxygen). The locations of the backbone oxygens of Gly320 and Leu284 are shown in green and the side chain S of Cys285 is shown in yellow. Gly320 is the only one of these residues located in a surface pocket.

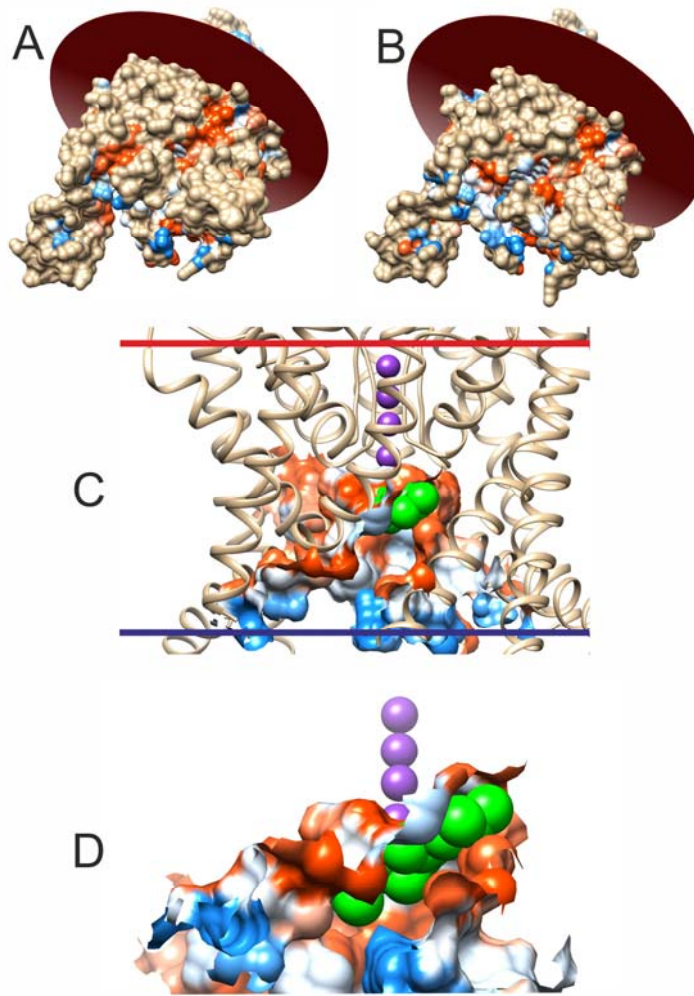

FIGURE S3 Cholesterol docking to TRAAK channels. (*A, B*) The membrane-spanning regions of the TRAAK channel in the up (*A*; PDF file 4WFE) and down states (*B*; PDF file 4WFF) with the EC membrane surface shown in red. The views are tilted to show the large openings on the IC side in both the up and down states and the fenestrations present in the down (*B*) but not up (*A*) states. (*C, D*) Two views of a bound cholesterol molecule (green) hydrogen bonded to Leu151 in the central cavity in the down state, just below the selectivity filter, shown occupied by four  $K^+$  ions (purple).

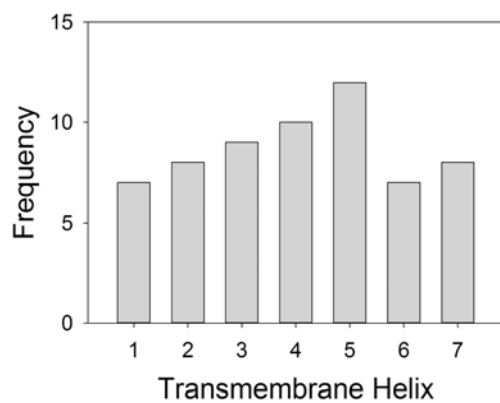

FIGURE S4 Helix involvement in deep cholesterol binding to A class GPCRs. The frequencies with which the seven TM  $\alpha$ -helices in the 36 GPCRs studied provide residues involved in hydrogen bonding to deep cholesterol molecules.

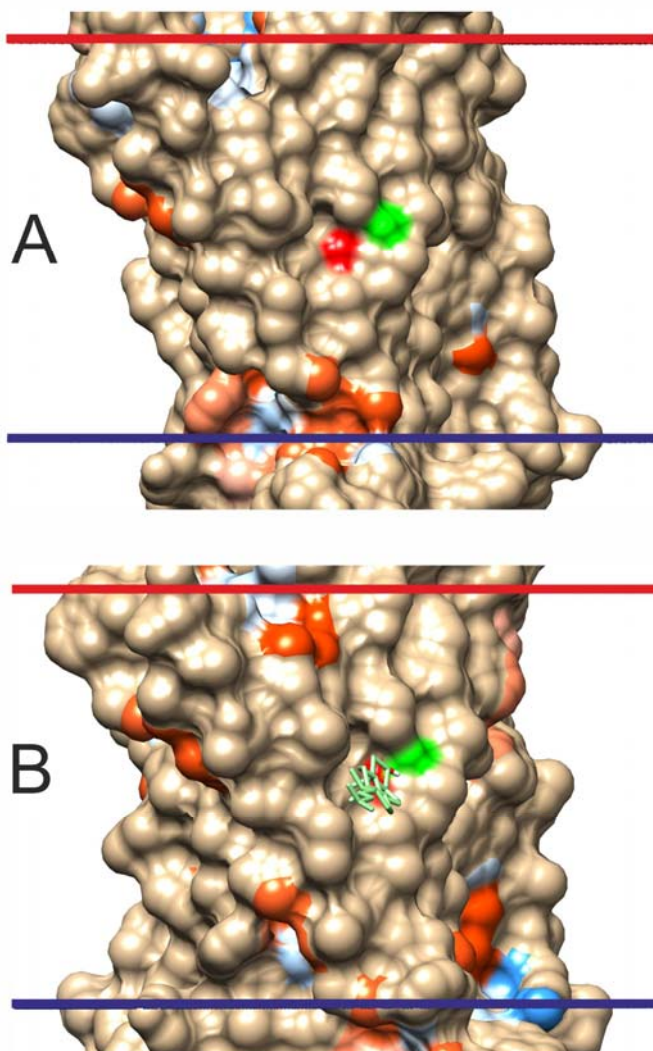

FIGURE S5 Cholesterol binding to the antagonist-bound  $A_{2A}$  adenosine receptor. The TM surfaces of PDB files 4EIY (A) and 5UIG (B) showing surface pockets identified using CASTp. The 5UIG structure shows a single binding site of binding energy  $-6.1 \text{ kcal mol}^{-1}$ . The locations of the backbone oxygens of Gly56 and Val57 are coloured red and green respectively.

TABLE S1 GPCRs

| E <sup>1</sup>                                                                                    | Donor         | Acceptor | Local Residues (within 3 Å of a cholesterol –OH group) |     |               |                |               |               |  |
|---------------------------------------------------------------------------------------------------|---------------|----------|--------------------------------------------------------|-----|---------------|----------------|---------------|---------------|--|
| <b>GPCR Class A<sup>2</sup></b>                                                                   |               |          |                                                        |     |               |                |               |               |  |
| 5-hydroxytryptamine receptor 1B, bound ergotamine, Human 4iar                                     |               |          |                                                        |     |               |                |               |               |  |
| -6.5                                                                                              | Chl           | OH       | Thr64 [1.47]                                           | OG1 | Thr64 [1.47]  | Ser99 [2.54]   |               |               |  |
| 5-hydroxytryptamine receptor 1B, bound dihydroergotamine, Human 4iaq                              |               |          |                                                        |     |               |                |               |               |  |
| -6.3                                                                                              | Chl           | OH       | Ser99 [2.54]                                           | O   | Thr64 [1.47]  | Ser99 [2.54]   |               |               |  |
|                                                                                                   | Chl           | OH       | Thr64 [1.47]                                           | OG1 |               |                |               |               |  |
| -6.2                                                                                              | Chl           | OH       | Thr64 [1.47]                                           | OG1 | Thr60 [1.43]  | Leu61 [1.44]   | Thr64 [1.47]  |               |  |
| -5.8                                                                                              | Chl           | OH       | Thr64 [1.47]                                           | OG1 | Thr60 [1.43]  | Thr64 [1.47]   | Ser99 [2.54]  |               |  |
| 5-hydroxytryptamine receptor 2B, bound ergotamine, Human 4ib4                                     |               |          |                                                        |     |               |                |               |               |  |
| -6.0                                                                                              | Chl           | OH       | Thr228 [5.49]                                          | OG1 | Leu223 [5.45] | Phe227 [5.48]  | Thr228 [5.49] |               |  |
| -5.9                                                                                              | Chl           | OH       | Ala224 [5.46]                                          | O   | Ala224 [5.46] | Thr228 [5.49]  |               |               |  |
|                                                                                                   | Chl           | OH       | Thr228 [5.49]                                          | OG1 | Ala224 [5.46] | Thr228 [5.49]  |               |               |  |
| -5.5                                                                                              | Chl           | OH       | Met63 [1.411]                                          | O   | Met63 [1.411] |                |               |               |  |
| 5-hydroxytryptamine receptor 2B, Human 4nc3                                                       |               |          |                                                        |     |               |                |               |               |  |
| -6.7                                                                                              | Chl           | OH       | Thr228 [5.49]                                          | OG1 | Ala224 [5.46] | Thr228 [5.49]  |               |               |  |
| -5.7                                                                                              | Chl           | OH       | Met63 [1.411]                                          | O   | Met63 [1.411] |                |               |               |  |
| 5-hydroxytryptamine receptor 2B, bound LSD, Human 5tvn                                            |               |          |                                                        |     |               |                |               |               |  |
| -5.5                                                                                              | Chl           | OH       | Thr228 [5.49]                                          | OG1 | Thr228 [5.49] |                |               |               |  |
| Adenosine receptor A1, Human 5uen                                                                 |               |          |                                                        |     |               |                |               |               |  |
| -5.8                                                                                              | Ser246 [6.47] | OG       | Chl                                                    | O   | Leu242 [6.43] | Ser246 [6.47]  |               |               |  |
| Adenosine receptor A1 with PSB36 [PDB residues renumbered], Human 5n2s                            |               |          |                                                        |     |               |                |               |               |  |
| -5.8                                                                                              | Chl           | OH       | Ser246 [6.47]                                          | OG  | Ser246 [6.47] | Leu276 [7.40]  | Asn280 [7.45] | Met283 [7.48] |  |
| Adenosine receptor A2a, thermostable mutant, active-like, complex with agonist, Human 4uhr        |               |          |                                                        |     |               |                |               |               |  |
| None                                                                                              |               |          |                                                        |     |               |                |               |               |  |
| Adenosine receptor A2a, thermostable mutant staR2, complex with antagonist, Human 3uza            |               |          |                                                        |     |               |                |               |               |  |
| -5.8                                                                                              | Chl           | OH       | Cys185 [5.461]                                         | O   | Gln89 [3.37]  | Cys185 [5.461] |               |               |  |
| Adenosine receptor A2a, complex with inverse-agonist antibody and antagonist ZM241385, Human 3vg9 |               |          |                                                        |     |               |                |               |               |  |
| -5.9                                                                                              | Chl           | OH       | Gly56 [2.54]                                           | O   | Gly56 [2.54]  | Val57 [2.55]   |               |               |  |
|                                                                                                   | Chl           | OH       | Val57 [2.55]                                           | O   |               |                |               |               |  |
| Adenosine receptor A2a, complex with antagonist ZM241385, Human 3vga                              |               |          |                                                        |     |               |                |               |               |  |
| None                                                                                              |               |          |                                                        |     |               |                |               |               |  |
| Adenosine receptor A2a, inactive state, with antagonist ZM241385, Human 3eml                      |               |          |                                                        |     |               |                |               |               |  |
| None                                                                                              |               |          |                                                        |     |               |                |               |               |  |
| Adenosine receptor A2a, thermostable mutant staR2, complex with caffeine, Human 3rfm              |               |          |                                                        |     |               |                |               |               |  |
| None                                                                                              |               |          |                                                        |     |               |                |               |               |  |
| Adenosine receptor A2a, thermostable mutant staR2, inactive state, complex with XAC, Human 3rey   |               |          |                                                        |     |               |                |               |               |  |
| None                                                                                              |               |          |                                                        |     |               |                |               |               |  |
| Adenosine receptor A2a, thermostable mutant staR2, nactive state, with ZM241385, Human 3pwh       |               |          |                                                        |     |               |                |               |               |  |
| None                                                                                              |               |          |                                                        |     |               |                |               |               |  |

| E <sup>1</sup>                                                                                                    | Donor | Acceptor | Local Residues (within 3 Å of a cholesterol –OH group) |     |               |               |               |  |  |
|-------------------------------------------------------------------------------------------------------------------|-------|----------|--------------------------------------------------------|-----|---------------|---------------|---------------|--|--|
| Adenosine receptor A2a, inactive state, with lipids and ZM241385, Human 4eiy                                      |       |          |                                                        |     |               |               |               |  |  |
| None                                                                                                              |       |          |                                                        |     |               |               |               |  |  |
| Adenosine receptor A2a, inactive state, with bound antagonist theophylline, Human 5k2a                            |       |          |                                                        |     |               |               |               |  |  |
| None                                                                                                              |       |          |                                                        |     |               |               |               |  |  |
| Adenosine receptor A2a, inactive state, with bound antagonist theophylline, Human 5k2b                            |       |          |                                                        |     |               |               |               |  |  |
| None                                                                                                              |       |          |                                                        |     |               |               |               |  |  |
| Adenosine receptor A2a, inactive state, with bound antagonist theophylline, Human 5k2c                            |       |          |                                                        |     |               |               |               |  |  |
| None                                                                                                              |       |          |                                                        |     |               |               |               |  |  |
| Adenosine receptor A2a, inactive state, with bound antagonist theophylline, Human 5k2d                            |       |          |                                                        |     |               |               |               |  |  |
| None                                                                                                              |       |          |                                                        |     |               |               |               |  |  |
| Adenosine receptor A2a, thermostable mutant staR2, inactive state, with bound antagonist theophylline, Human 5mzj |       |          |                                                        |     |               |               |               |  |  |
| -5.7                                                                                                              | Chl   | OH       | Gly56 [2.54]                                           | O   | Gly56 [2.54]  | Val57 [2.55]  |               |  |  |
|                                                                                                                   | Chl   | OH       | Val57 [2.55]                                           | O   |               |               |               |  |  |
| Adenosine receptor A2a, thermostable mutant staR2, inactive state, with bound antagonist caffeine, Human 5mzp     |       |          |                                                        |     |               |               |               |  |  |
| -5.6                                                                                                              | Chl   | OH       | Gly56 [2.54]                                           | O   | Gly56 [2.54]  | Val57 [2.55]  |               |  |  |
|                                                                                                                   | Chl   | OH       | Val57 [2.55]                                           | O   |               |               |               |  |  |
| Adenosine receptor A2a, thermostable mutant staR2, inactive state, with bound antagonist PSB36, Human 5n2r        |       |          |                                                        |     |               |               |               |  |  |
| None                                                                                                              |       |          |                                                        |     |               |               |               |  |  |
| Adenosine receptor A2a,thermostable mutant staR2, inactive state, with bound antagonist ZMA, Human 5nlx           |       |          |                                                        |     |               |               |               |  |  |
| None                                                                                                              |       |          |                                                        |     |               |               |               |  |  |
| Adenosine receptor A2a, thermostable mutant staR2, inactive state, with bound antagonist ZMA, Human 5nm2          |       |          |                                                        |     |               |               |               |  |  |
| None                                                                                                              |       |          |                                                        |     |               |               |               |  |  |
| Adenosine receptor A2a,thermostable mutant staR2, inactive state, with bound antagonist ZMA, Human 5nm4           |       |          |                                                        |     |               |               |               |  |  |
| None                                                                                                              |       |          |                                                        |     |               |               |               |  |  |
| Adenosine receptor A2a,partially active state with agonist UK-432097, Human 3qak                                  |       |          |                                                        |     |               |               |               |  |  |
| None                                                                                                              |       |          |                                                        |     |               |               |               |  |  |
| Adenosine receptor A2a, thermostable mutant, partially active state with bound adenosine, Human 2ydo              |       |          |                                                        |     |               |               |               |  |  |
| None                                                                                                              |       |          |                                                        |     |               |               |               |  |  |
| Adenosine receptor A2a, thermostable mutant,partially active state with agonist NECA, Human 2ydv                  |       |          |                                                        |     |               |               |               |  |  |
| -5.5                                                                                                              | Chl   | OH       | Gly56 [2.54]                                           | O   | Gly56 [2.54]  | Val57 [2.55]  |               |  |  |
|                                                                                                                   | Chl   | OH       | Val57 [2.55]                                           | O   |               |               |               |  |  |
| Adenosine receptor A2a, with G-alpha-S protein, Human 5g53                                                        |       |          |                                                        |     |               |               |               |  |  |
| None                                                                                                              |       |          |                                                        |     |               |               |               |  |  |
| Adenosine receptor A2a, with triazole-carboximidamide antagonist, Human 5uig                                      |       |          |                                                        |     |               |               |               |  |  |
| -6.1                                                                                                              | Chl   | OH       | Gly56 [2.54]                                           | O   | Ala17 [1.43]  | Gly56 [2.54]  | Val57 [2.55]  |  |  |
|                                                                                                                   | Chl   | OH       | Val57 [2.55]                                           | O   |               |               |               |  |  |
| Adenosine receptor A2a,thermostable mutant, with antagonist, Human 6aqf                                           |       |          |                                                        |     |               |               |               |  |  |
| -5.5                                                                                                              | Chl   | OH       | Val57 [2.55]                                           | O   | Gly56 [2.54]  | Val57 [2.55]  |               |  |  |
| Adenosine receptor A2a, thermostable mutant StaR2, inactive with lipid, Human 5o1g                                |       |          |                                                        |     |               |               |               |  |  |
| -5.8                                                                                                              | Chl   | OH       | Thr279 [7.44]                                          | OG1 | Val275 [7.40] | Leu276 [7.41] | Thr279 [7.44] |  |  |
| -5.6                                                                                                              | Chl   | OH       | Gly56 [2.54]                                           | O   | Gly56 [2.54]  | Val57 [2.55]  | Pro61 [2.59]  |  |  |



| E <sup>1</sup>                                                                     | Donor |    | Acceptor      |     | Local Residues (within 3 Å of a cholesterol –OH group) |               |               |  |
|------------------------------------------------------------------------------------|-------|----|---------------|-----|--------------------------------------------------------|---------------|---------------|--|
| Adenosine receptor A2a, thermostable mutant StaR2, inactive with lipid, Human 5o1h |       |    |               |     |                                                        |               |               |  |
| -5.8                                                                               | Chl   | OH | Gly56 [2.54]  | O   | Gly56 [2.54]                                           | Val57 [2.55]  | Pro61 [2.59]  |  |
| -5.7                                                                               | Chl   | OH | Thr279 [7.44] | OG1 | Val275 [7.40]                                          | Leu276 [7.41] | Thr279 [7.44] |  |
|                                                                                    | Chl   | OH | Val57 [2.55]  |     |                                                        |               |               |  |
| Adenosine receptor A2a, thermostable mutant StaR2, inactive with lipid, Human 5om1 |       |    |               |     |                                                        |               |               |  |
| -5.7                                                                               | Chl   | OH | Gly56 [2.54]  | O   | Gly56 [2.54]                                           | Val57 [2.55]  |               |  |
|                                                                                    | Chl   | OH | Val57 [2.55]  |     |                                                        |               |               |  |
| Adenosine receptor A2a, thermostable mutant StaR2, inactive with lipid, Human 5om4 |       |    |               |     |                                                        |               |               |  |
| -5.7                                                                               | Chl   | OH | Gly56 [2.54]  | O   | Gly56 [2.54]                                           | Val57 [2.55]  |               |  |
|                                                                                    | Chl   | OH | Val57 [2.55]  | O   |                                                        |               |               |  |
| Adenosine receptor A2a, mylar structure, Human 5vra                                |       |    |               |     |                                                        |               |               |  |
| -6.0                                                                               | Chl   | OH | Gly56 [2.54]  | O   | Gly56 [2.54]                                           | Val57 [2.55]  |               |  |
|                                                                                    | Chl   | OH | Val57 [2.55]  | O   |                                                        |               |               |  |

|                                                                                        |     |    |               |    |               |               |               |  |
|----------------------------------------------------------------------------------------|-----|----|---------------|----|---------------|---------------|---------------|--|
| Angiotensin II receptor Type-1 (AT1) with bound antagonist, Human 4yay                 |     |    |               |    |               |               |               |  |
| -5.6                                                                                   | Chl | OH | Phe251 [6.46] | O  | Phe251 [6.46] |               |               |  |
| Angiotensin II receptor Type-1 (AT1) with bound inverse agonist olmesartan, Human 4zud |     |    |               |    |               |               |               |  |
| -6.8                                                                                   | Chl | OH | Ser252 [6.47] | OG | Phe248 [6.43] | Phe251 [6.46] | Ser252 [6.47] |  |
| Angiotensin II receptor Type-2 (AT2) active-like state, Human 5ung                     |     |    |               |    |               |               |               |  |
| -6.6                                                                                   | Chl | OH | Ser174 [4.56] | OG | Met170 [4.52] | Leu173 [4.55] | Ser174 [4.56] |  |
| Angiotensin II receptor Type-2 (AT2) active-like state, Human 5unf                     |     |    |               |    |               |               |               |  |
| -7.1                                                                                   | Chl | OH | Ser174 [4.56] | OG | Met170 [4.52] | Ser174 [4.56] |               |  |
| Angiotensin II receptor Type-2 (AT2) active-like state, Human 5unh                     |     |    |               |    |               |               |               |  |
| -6.6                                                                                   | Chl | OH | Ser174 [4.56] | OG | Met170 [4.52] | Leu173 [4.55] | Ser174 [4.56] |  |

|                                                                 |     |    |               |     |               |               |               |               |
|-----------------------------------------------------------------|-----|----|---------------|-----|---------------|---------------|---------------|---------------|
| Beta-1 adrenergic receptor with bound dobutamine, Turkey 2y00   |     |    |               |     |               |               |               |               |
| -6.1                                                            | Chl | OH | Ile214 [5.45] | O   | Glu130 [3.41] | Ile214 [5.45] | Pro219 [5.50] |               |
| Beta-1 adrenergic receptor with bound dobutamine, Turkey 2y01   |     |    |               |     |               |               |               |               |
| -6.7                                                            | Chl | OH | Leu171 [4.55] | O   | Ala170 [4.54] | Leu171 [4.55] | Leu175 [4.59] |               |
| -6.3                                                            | Chl | OH | Leu171 [4.55] | O   | Ala170 [4.54] | Leu171 [4.55] | Phe174 [4.58] | Leu175 [4.59] |
| -5.6                                                            | Chl | OH | Ile214 [5.45] | O   | Glu130 [3.41] | Ile214 [5.45] | Pro219 [5.50] |               |
| Beta-1 adrenergic receptor with bound carmoterol, Turkey 2y02   |     |    |               |     |               |               |               |               |
| -6.7                                                            | Chl | OH | Leu171 [4.55] | O   | Ala170 [4.54] | Leu171 [4.55] | Leu175 [4.59] |               |
| -6.3                                                            | Chl | OH | Leu171 [4.55] | O   | Ala170 [4.54] | Leu171 [4.55] | Phe174 [4.58] | Leu175 [4.59] |
| -5.8                                                            | Chl | OH | Ile214 [5.45] | O   | Glu130 [3.41] | Ile214 [5.45] |               |               |
| -5.5                                                            | Chl | OH | Glu130 [3.41] | OE2 | Glu130 [3.41] | Ile214 [5.45] | Pro219 [5.50] |               |
|                                                                 | Chl | OH | Ile214 [5.45] | O   |               |               |               |               |
| Beta-1 adrenergic receptor with bound isoprenaline, Turkey 2y03 |     |    |               |     |               |               |               |               |
| -5.7                                                            | Chl | OH | Glu130 [3.41] | OE2 | Glu130 [3.41] | Ile214 [5.45] |               |               |
|                                                                 | Chl | OH | Ile214 [5.45] | O   |               |               |               |               |
| Beta-1 adrenergic receptor with bound salbutamol, Turkey 2y04   |     |    |               |     |               |               |               |               |
| -5.9                                                            | Chl | OH | Ile214 [5.45] | O   | Glu130 [3.41] | Ile214 [5.45] |               |               |
| -5.8                                                            | Chl | OH | Leu171 [4.55] | O   | Ala170 [4.54] | Leu175 [4.59] |               |               |

| E <sup>1</sup>                                                               | Donor |    | Acceptor      |     | Local Residues (within 3 Å of a cholesterol –OH group) |               |               |  |  |
|------------------------------------------------------------------------------|-------|----|---------------|-----|--------------------------------------------------------|---------------|---------------|--|--|
| Beta-1 adrenergic receptor, with bound carazolol, Turkey 2ycw                |       |    |               |     |                                                        |               |               |  |  |
| -5.6                                                                         | Chl   | OH | Glu130 [3.41] | OE2 | Glu130 [3.41]                                          | Ile214 [5.45] |               |  |  |
|                                                                              | Chl   | OH | Ile214 [5.45] | O   |                                                        |               |               |  |  |
| Beta-1 adrenergic receptor, with bound cyanopindolol, Turkey 2ycx            |       |    |               |     |                                                        |               |               |  |  |
| -5.7                                                                         | Chl   | OH | Glu130 [3.41] | OE2 | Glu130 [3.41]                                          | Ile214 [5.45] |               |  |  |
|                                                                              | Chl   | OH | Ile214 [5.45] | O   |                                                        |               |               |  |  |
| Beta-1 adrenergic receptor, with bound cyanopindolol, Turkey 2ycy            |       |    |               |     |                                                        |               |               |  |  |
| None                                                                         |       |    |               |     |                                                        |               |               |  |  |
| Beta-1 adrenergic receptor, with bound iodocyanopindolol, Turkey 2ycz        |       |    |               |     |                                                        |               |               |  |  |
| -5.8                                                                         | Chl   | OH | Glu130 [3.41] | OE2 | Glu130 [3.41]                                          | Ile214 [5.45] |               |  |  |
|                                                                              | Chl   | OH | Ile214 [5.45] | O   |                                                        |               |               |  |  |
| -5.6                                                                         | Chl   | OH | Ile214 [5.45] | O   | Glu130 [3.41]                                          | Ile214 [5.45] | Pro219 [5.50] |  |  |
| Beta-1 adrenergic receptor, basal state, Turkey 4gpo                         |       |    |               |     |                                                        |               |               |  |  |
| -5.5                                                                         | Chl   | OH | Glu130 [3.41] | OE2 | Glu130 [3.41]                                          | Ile214 [5.45] |               |  |  |
|                                                                              | Chl   | OH | Ile214 [5.45] | O   |                                                        |               |               |  |  |
| Beta-1 adrenergic receptor, inactive, engineered, Turkey 2vt4                |       |    |               |     |                                                        |               |               |  |  |
| -5.8                                                                         | Chl   | OH | Ile214 [5.45] | O   | Glu130 [3.41]                                          | Ile214 [5.45] |               |  |  |
| Beta-1 adrenergic receptor, engineered, with bound carvedilol, Turkey 4amj   |       |    |               |     |                                                        |               |               |  |  |
| -5.6                                                                         | Chl   | OH | Glu130 [3.41] | OE2 | Glu130 [3.41]                                          | Ile214 [5.45] | Pro219 [5.50] |  |  |
|                                                                              | Chl   | OH | Ile214 [5.45] | O   |                                                        |               |               |  |  |
| Beta-1 adrenergic receptor, engineered, with bound bucindolol, Turkey 4ami   |       |    |               |     |                                                        |               |               |  |  |
| -6.1                                                                         | Chl   | OH | Glu130 [3.41] | OE2 | Glu130 [3.41]                                          | Ile214 [5.45] |               |  |  |
| Beta-1 adrenergic receptor, engineered, with inverse agonist, Turkey 5a8e    |       |    |               |     |                                                        |               |               |  |  |
| -6.7                                                                         | Chl   | OH | Ser169 [4.53] | OG  | Val165 [4.49]                                          | Ile168 [4.52] | Ser169 [4.53] |  |  |
| Beta-2 adrenergic receptor, active state, complex with antibody, Human 3p0g  |       |    |               |     |                                                        |               |               |  |  |
| -6.2                                                                         | Chl   | OH | Glu122 [3.41] | OE1 | Glu122 [3.41]                                          | Val206 [5.46] |               |  |  |
|                                                                              | Chl   | OH | Glu122 [3.41] | OE2 |                                                        |               |               |  |  |
|                                                                              | Chl   | OH | Val206 [5.46] | O   |                                                        |               |               |  |  |
| Beta-2 adrenergic receptor, active state, complex with G-protein, Human 3sn6 |       |    |               |     |                                                        |               |               |  |  |
| -5.8                                                                         | Chl   | OH | Glu122 [3.41] | OE2 | Glu122 [3.41]                                          | Val206 [5.46] |               |  |  |
|                                                                              | Chl   | OH | Val206 [5.46] | O   |                                                        |               |               |  |  |
| -5.4                                                                         | Chl   | OH | Glu122 [3.41] | OE2 | Glu122 [3.41]                                          |               |               |  |  |
| Beta-2 adrenergic receptor, agonist bound. Human 3pds                        |       |    |               |     |                                                        |               |               |  |  |
| -5.6                                                                         | Chl   | OH | Glu122 [3.41] | OE2 | Glu122 [3.41]                                          | Val206 [5.46] |               |  |  |
|                                                                              | Chl   | OH | Val206 [5.46] | O   |                                                        |               |               |  |  |
| Beta-2 adrenergic receptor, inactive state, Human 3d4s                       |       |    |               |     |                                                        |               |               |  |  |
| -7.1                                                                         | Chl   | OH | Gly320 [7.47] | O   | Val317 [7.43]                                          | Gly320 [7.47] | Phe321 [7.48] |  |  |
| -6.1                                                                         | Chl   | OH | Ser161 [4.53] | OG  | Val157 [4.49]                                          | Ser161 [4.53] |               |  |  |
| Beta-2 adrenergic receptor, inactive state, Human 2rh1                       |       |    |               |     |                                                        |               |               |  |  |
| -6.7                                                                         | Chl   | OH | Gly320 [7.47] | O   | Val317 [7.43]                                          | Gly320 [7.47] | Phe321 [7.48] |  |  |
| -5.8                                                                         | Chl   | OH | Gly320 [7.47] | O   | Val317 [7.43]                                          | Gly320 [7.47] |               |  |  |

| E <sup>1</sup>                                                                       | Donor | Acceptor | Local Residues (within 3 Å of a cholesterol –OH group) |     |               |               |               |               |  |
|--------------------------------------------------------------------------------------|-------|----------|--------------------------------------------------------|-----|---------------|---------------|---------------|---------------|--|
| Beta-2 adrenergic receptor, with allosteric antagonist, Human 5x7d                   |       |          |                                                        |     |               |               |               |               |  |
| -6.0                                                                                 | Chl   | OH       | Thr164 [4.56]                                          | OG1 | Val160 [4.52] | Leu163 [4.55] | Thr164 [4.56] |               |  |
| C5a anaphylatoxin chemotactic receptor 1, Human 5o9h                                 |       |          |                                                        |     |               |               |               |               |  |
| None                                                                                 |       |          |                                                        |     |               |               |               |               |  |
| C-C chemokine receptor type 2, Human 5t1a                                            |       |          |                                                        |     |               |               |               |               |  |
| -5.9                                                                                 | Chl   | OH       | Thr296 [7.43]                                          | OG1 | Thr296 7.43]  | Cys299 [7.47] |               |               |  |
| C-C chemokine receptor type 5 with bound Maraviroc Human 4mbs                        |       |          |                                                        |     |               |               |               |               |  |
| None                                                                                 |       |          |                                                        |     |               |               |               |               |  |
| C-C chemokine receptor type 9 with vercirnon, Human 5lwe                             |       |          |                                                        |     |               |               |               |               |  |
| None                                                                                 |       |          |                                                        |     |               |               |               |               |  |
| C-X-C chemokine receptor type 4, complex with vMIP-II, Human 4rws                    |       |          |                                                        |     |               |               |               |               |  |
| -6.9                                                                                 | Chl   | OH       | Cys251 [6.47]                                          | O   | Cys251 [6.47] | Thr287 [7.37] | Leu290 [7.40] | Ala291 [7.41] |  |
| -6.4                                                                                 | Chl   | OH       | Ala250 [6.46]                                          | O   | Ala250 [6.46] | Cys251 [6.47] |               |               |  |
|                                                                                      | Chl   | OH       | Cys251 [6.47]                                          | O   |               |               |               |               |  |
| -6.0                                                                                 | Chl   | OH       | Leu208 [5.47]                                          | O   | Leu208 [5.47] | Ile209 [5.48] | Gly212 [5.51] |               |  |
| C-X-C chemokine receptor type 4, inactive, with peptide antagonist CVX15, Human 3oe0 |       |          |                                                        |     |               |               |               |               |  |
| -7.1                                                                                 | Chl   | OH       | Cys251 [6.47]                                          | O   | Cys251 [6.47] | Thr287 [7.37] | Leu290 [7.40] | Ala291 [7.41] |  |
| -6.9                                                                                 | Chl   | OH       | Ala250 [6.46]                                          | O   | Ala250 [6.46] | Cys251 [6.47] | Pro254 [6.50] |               |  |
|                                                                                      | Chl   | OH       | Cys251 [6.47]                                          | O   |               |               |               |               |  |
| -6.3                                                                                 | Chl   | OH       | Cys251 [6.47]                                          | O   | Cys251 [6.47] | Leu290 [7.40] | Ala291 [7.41] |               |  |
| -6.1                                                                                 | Chl   | OH       | Gly159 [4.48]                                          | O   | Gly159 [4.48] | Val160 [4.49] |               |               |  |
| C-X-C chemokine receptor type 4, inactive, with IT1t antagonist, Human 3oe6          |       |          |                                                        |     |               |               |               |               |  |
| -6.0                                                                                 | Chl   | OH       | Cys251 [6.47]                                          | O   | Cys251 [6.47] | Leu290 [7.40] | Ala291 [7.41] |               |  |
| -5.7                                                                                 | Chl   | OH       | Cys251 [6.47]                                          | O   | Ala250 [6.46] | Cys251 [6.47] | Pro254 [6.50] |               |  |
| C-X-C chemokine receptor type 4, with IT1t antagonist, Human 3odu                    |       |          |                                                        |     |               |               |               |               |  |
| -6.8                                                                                 | Chl   | OH       | Thr168 [4.57]                                          | OG1 | Leu165 [4.54] | Thr168 [4.57] | Ile169 [4.59] |               |  |
| -6.8                                                                                 | Chl   | OH       | Cys251 [6.47]                                          | O   | Ala250 [6.46] | Cys251 [6.47] |               |               |  |
| -6.7                                                                                 | Chl   | OH       | Cys251 [6.47]                                          | O   | Cys251 [6.47] | Leu290 [7.40] | Ala291 [7.41] |               |  |
| -6.3                                                                                 | Chl   | OH       | Cys251 [6.47]                                          | O   | Ala250 [6.46] | Cys251 [6.47] | Pro254 [6.50] |               |  |
| C-X-C chemokine receptor type 4, with IT1t antagonist, Human 3oe8                    |       |          |                                                        |     |               |               |               |               |  |
| None                                                                                 |       |          |                                                        |     |               |               |               |               |  |
| C-X-C chemokine receptor type 4, with IT1t antagonist, Human 3oe9                    |       |          |                                                        |     |               |               |               |               |  |
| -6.2                                                                                 | Chl   | OH       | Cys251 [6.47]                                          | O   | Cys251 [6.47] | Leu290 [7.40] | Ala291 [7.41] |               |  |
| -6.2                                                                                 | Chl   | OH       | Leu86 [2.52]                                           | O   | Leu86 [2.52]  | Thr90 [2.56]  | Ile115 [3.31] |               |  |
| Cannabinoid receptor 1, complex with antagonist AM6538, Human 5tgz                   |       |          |                                                        |     |               |               |               |               |  |
| -6.2                                                                                 | Chl   | OH       | Ser284 [5.48]                                          | OG  | Val283 [5.47] | Ser284 [5.48] |               |               |  |
| -5.7                                                                                 | Chl   | OH       | Thr391 [7.47]                                          | OG1 | Thr391 [7.47] |               |               |               |  |
| Cannabinoid receptor 1, with bound inhibitor taranabant, Human 5u09                  |       |          |                                                        |     |               |               |               |               |  |
| -6.5                                                                                 | Chl   | OH       | Ser284 [5.48]                                          | OG  | Thr283 [5.47] | Ser284 [5.48] |               |               |  |

| E <sup>1</sup>                                                         | Donor | Acceptor | Local Residues (within 3 Å of a cholesterol –OH group) |     |                |                |                |  |  |
|------------------------------------------------------------------------|-------|----------|--------------------------------------------------------|-----|----------------|----------------|----------------|--|--|
| Cannabinoid receptor 1, with bound agonist, Human 5xr8                 |       |          |                                                        |     |                |                |                |  |  |
| -7.3                                                                   | Chl   | OH       | Ser199 [3.35]                                          | OG  | Gly195 [3.31]  | Ala198 [3.34]  | Ser199 [3.35]  |  |  |
| -6.3                                                                   | Chl   | OH       | Thr128 [1.44]                                          | OG1 | Gly127 [1.43]  | Thr128 [1.44]  |                |  |  |
| Cannabinoid receptor 1, with bound agonist, Human 5xra                 |       |          |                                                        |     |                |                |                |  |  |
| -7.5                                                                   | Chl   | OH       | Thr128 [1.44]                                          | OG1 | Leu124 [1.40]  | Thr128 [1.44]  |                |  |  |
| -6.7                                                                   | Chl   | OH       | Ser199 [3.35]                                          | OG  | Gly195 [3.31]  | Ala198 [3.34]  | Ser199 [3.35]  |  |  |
| Dopamine D2 receptor complex with risperidone, Human, 6c38             |       |          |                                                        |     |                |                |                |  |  |
| None                                                                   |       |          |                                                        |     |                |                |                |  |  |
| Dopamine D3 receptor complex with antagonist, Human 3pbl               |       |          |                                                        |     |                |                |                |  |  |
| None                                                                   |       |          |                                                        |     |                |                |                |  |  |
| Dopamine D4 receptor complex with nemonapride, Human 5wiu              |       |          |                                                        |     |                |                |                |  |  |
| -7.2                                                                   | Chl   | OH       | Thr159 [4.49]                                          | OG1 | Phe124 [3.41]  | Thr159 [4.49]  |                |  |  |
| Dopamine D4 receptor Na-bound complex with nemonapride, Human 5wiv     |       |          |                                                        |     |                |                |                |  |  |
| -6.1                                                                   | Chl   | OH       | Thr159 [4.49]                                          | OG1 | Phe124 [3.41]  | Thr159 [4.49]  |                |  |  |
| -6.1                                                                   | Chl   | OH       | Phe202 [5.48]                                          | O   | Phe202 [5.48]  |                |                |  |  |
| -5.7                                                                   | Chl   | OH       | Thr408 [6.49]                                          | OG1 | Leu404 [6.45]  | Thr408 [6.49]  |                |  |  |
| Endothelin B receptor without bound endothelin-1, Human 5gli           |       |          |                                                        |     |                |                |                |  |  |
| None                                                                   |       |          |                                                        |     |                |                |                |  |  |
| Endothelin B receptor with antagonist, Human 5x93                      |       |          |                                                        |     |                |                |                |  |  |
| None                                                                   |       |          |                                                        |     |                |                |                |  |  |
| Endothelin B receptor, with bound endothelin-1, Human 5glh             |       |          |                                                        |     |                |                |                |  |  |
| -5.6                                                                   | Chl   | OH       | Ser279 [5.45]                                          | OG  | Ser279 [5.45]  | Phe280 [5.46]  |                |  |  |
| Free fatty acid receptor 1 GPR40 [PDB residues renumbered], Human 4phu |       |          |                                                        |     |                |                |                |  |  |
| -5.5                                                                   | Chl   | OH       | Leu235 [6.461]                                         | O   | Leu235 [6.461] | Cys2236 [6.47] |                |  |  |
| Histamine H1 receptor, complex with doxepin, Human 3rze                |       |          |                                                        |     |                |                |                |  |  |
| -7.0                                                                   | Chl   | OH       | Leu154 [4.52]                                          | O   | Leu154 [4.52]  | Trp158 [4.57]  | Asn198 [5.461] |  |  |
| Leukotriene BLT1 receptor, Guinea Pig 5x33                             |       |          |                                                        |     |                |                |                |  |  |
| -6.1                                                                   | Chl   | OH       | Ser278 [7.46]                                          | OG  | Leu275 [7.43]  | Ser278 [7.46]  |                |  |  |
| -6.0                                                                   | Chl   | OH       | Ser102 [3.37]                                          | OG  | Ile98 [3.33]   | Ser102 [3.37]  |                |  |  |
| Lysophosphatidic acid receptor 1 complex with ONO-9780307, Human 4z34  |       |          |                                                        |     |                |                |                |  |  |
| -6.2                                                                   | Chl   | OH       | Thr173 [4.51]                                          | OG1 | Val169 [4.47]  | Trp172 [4.50]  | Thr173 [4.51]  |  |  |
| Lysophosphatidic acid receptor 1 complex with ONO-9910539, Human 4z35  |       |          |                                                        |     |                |                |                |  |  |
| -6.2                                                                   | Chl   | OH       | Thr173 [4.51]                                          | OG1 | Val169 [4.47]  | Trp172 [4.50]  | Thr173 [4.51]  |  |  |
| Lysophosphatidic acid receptor 1 complex with ONO-3080573, Human 4z36  |       |          |                                                        |     |                |                |                |  |  |
| -6.2                                                                   | Chl   | OH       | Thr173 [4.51]                                          | OG1 | Val169 [4.47]  | Trp172 [4.50]  | Thr173 [4.51]  |  |  |

| E <sup>1</sup>                                                                         | Donor         |     | Acceptor       |     | Local Residues (within 3 Å of a cholesterol –OH group) |                |                |              |              |
|----------------------------------------------------------------------------------------|---------------|-----|----------------|-----|--------------------------------------------------------|----------------|----------------|--------------|--------------|
| Muscarinic acetylcholine receptor M1 with bound tiotropium, Human 5cxv                 |               |     |                |     |                                                        |                |                |              |              |
| -7.1                                                                                   | Chl           | OH  | Ser36 [1.43]   | OG  | Ser36 [1.43]                                           | Gly75 [2.54]   | Thr76 [2.55]   | Asn80 [2.58] |              |
| -5.7                                                                                   | Chl           | OH  | Ala195 [5.46]  | O   | Gln110 [3.37]                                          | Ala195 [5.46]  | Ala196 [5.461] |              |              |
|                                                                                        | Chl           | OH  | Ala196 [5.461] | O   |                                                        |                |                |              |              |
| Muscarinic acetylcholine receptor M2 with bound agonist iperoxo, Human 4mq5            |               |     |                |     |                                                        |                |                |              |              |
| -7.6                                                                                   | Chl           | OH  | Ser32 [1.41]   | OG  | Leu28 [1.37]                                           | Ser32 [1.41]   |                |              |              |
| -7.1                                                                                   | Chl           | OH  | Ser32 [1.41]   | OG  | Leu28 [1.37]                                           | Gly31 [1.40]   | Ser32 [1.41]   |              |              |
| Muscarinic acetylcholine receptor M2 with bound antagonist, Human 3uon                 |               |     |                |     |                                                        |                |                |              |              |
| -7.1                                                                                   | Chl           | OH  | Ser34 [1.43]   | OG  | Ser34 [1.43]                                           | Asn78 [2.58]   |                |              |              |
| -6.8                                                                                   | Chl           | OH  | Ser32 [1.41]   | OG  | Leu28 [1.37]                                           | Gly31 [1.40]   | Ser32 [1.41]   |              |              |
| -6.3                                                                                   | Chl           | OH  | Ser34 [1.43]   | OG  | Ser34 [1.43]                                           | Ile38 [1.47]   | Gly73 [2.54]   | Val74 [2.55] | Asn78 [2.58] |
| Muscarinic acetylcholine receptor M3, lysozyme fusion, with bound tiotropium, Rat 4daj |               |     |                |     |                                                        |                |                |              |              |
| -6.9                                                                                   | Chl           | OH  | Gly117 [2.54]  | O   | Ala78 [1.43]                                           | Gly117 [2.54]  | Asn122 [2.58]  |              |              |
| -5.7                                                                                   | Chl           | OH  | Ala238 [5.461] | O   | Asn152 [3.37]                                          | Val155 [3.40]  | Ala238 [5.461] |              |              |
| Muscarinic acetylcholine receptor M3, lysozyme fusion, with bound tiotropium, Rat 4u15 |               |     |                |     |                                                        |                |                |              |              |
| -6.8                                                                                   | Trp199 [4.57] | NE1 | Chl            | O   | Asn152 [3.37]                                          | Trp199 [4.57]  | Ala238 [5.461] |              |              |
| -6.1                                                                                   | Chl           | OH  | Thr504 [6.49]  | OG1 | Ile500 [6.45]                                          | Thr504 [6.49]  |                |              |              |
| Muscarinic acetylcholine receptor M4 with bound tiotropium, Human 5dsg                 |               |     |                |     |                                                        |                |                |              |              |
| -7.5                                                                                   | Chl           | OH  | Ser43 [1.43]   | OG  | Ser43 [1.43]                                           | Asn87 [2.58]   |                |              |              |
| -6.8                                                                                   | Chl           | OH  | Ser41 [1.41]   | OG  | Thr37 [1.37]                                           | Gly40 [1.40]   | Ser41 [1.41]   |              |              |
| -6.0                                                                                   | Chl           | OH  | Ala203 [5.461] | O   | Asn117 [3.37]                                          | Ala203 [5.461] |                |              |              |
| Neurotensin receptor type 1, complex with neurotensin, Rat 4grv                        |               |     |                |     |                                                        |                |                |              |              |
| None                                                                                   |               |     |                |     |                                                        |                |                |              |              |
| Neurotensin receptor type 1, agonist bound, Rat 4buo                                   |               |     |                |     |                                                        |                |                |              |              |
| None                                                                                   |               |     |                |     |                                                        |                |                |              |              |
| Neurotensin receptor type 1, mutant, Rat 3zev                                          |               |     |                |     |                                                        |                |                |              |              |
| None                                                                                   |               |     |                |     |                                                        |                |                |              |              |
| Neurotensin receptor type 1, mutant, Rat 4bv0                                          |               |     |                |     |                                                        |                |                |              |              |
| None                                                                                   |               |     |                |     |                                                        |                |                |              |              |
| Neurotensin receptor type 1, engineered, Rat 4xee                                      |               |     |                |     |                                                        |                |                |              |              |
| None                                                                                   |               |     |                |     |                                                        |                |                |              |              |
| Neurotensin receptor type 1, engineered, Rat 4xes                                      |               |     |                |     |                                                        |                |                |              |              |
| -5.5                                                                                   | Cys152 [3.35] | SG  | Chl            | O   | Leu148 [3.31]                                          | Ala151 [3.34]  | Cys152 [3.35]  |              |              |
| Neurotensin receptor type 1, constitutively active mutant, Rat 5t04                    |               |     |                |     |                                                        |                |                |              |              |
| -7.7                                                                                   | Chl           | OH  | Ser197 [4.53]  | OG  | Trp194 [4.50]                                          | Ser197 [4.53]  | Ala198 [4.54]  |              |              |
| Nociceptin (NOP) receptor with bound C-35, Human 5dhg                                  |               |     |                |     |                                                        |                |                |              |              |
| -5.8                                                                                   | Chl           | OH  | Ser179 [4.54]  | OG  | Trp175 [4.50]                                          | Ala176 [4.51]  | Ser179 [4.54]  |              |              |
| Nociceptin (NOP) receptor, engineered, with bound C-35, Human 5dhh                     |               |     |                |     |                                                        |                |                |              |              |
| -6.1                                                                                   | Chl           | OH  | Tyr132 [3.34]  | OH  | Tyr132 [3.34]                                          | Ser179 [4.54]  |                |              |              |

| E <sup>1</sup>                                          | Donor |    | Acceptor      |    | Local Residues (within 3 Å of a cholesterol –OH group) |               |  |  |  |
|---------------------------------------------------------|-------|----|---------------|----|--------------------------------------------------------|---------------|--|--|--|
| Nociceptin (NOP)receptor with bound peptide, Human 4ea3 |       |    |               |    |                                                        |               |  |  |  |
| -5.9                                                    | Chl   | OH | Ser179 [4.54] | OG | Trp175 [4.50]                                          | Ser179 [4.54] |  |  |  |

|                                                                       |     |    |               |    |               |               |               |  |  |
|-----------------------------------------------------------------------|-----|----|---------------|----|---------------|---------------|---------------|--|--|
| Opioid delta receptor complex with naltrindol, Mouse 4ej4             |     |    |               |    |               |               |               |  |  |
| -6.8                                                                  | Chl | OH | Ser312 [7.47] | OG | Ala309 [7.43] | Ser312 [7.47] | Leu313 [7.48] |  |  |
| -6.1                                                                  | Chl | OH | Tyr130 [3.34] | OH | Tyr130 [3.34] | Ser177 [4.54] |               |  |  |
| Opioid delta receptor, complex with naltrindol, Human 4n6h            |     |    |               |    |               |               |               |  |  |
| None                                                                  |     |    |               |    |               |               |               |  |  |
| Opioid delta receptor, complex with tetrapeptide DIPP-NH2, Human 4rwd |     |    |               |    |               |               |               |  |  |
| -6.0                                                                  | Chl | OH | Tyr130 [3.34] | OH | Tyr130 [3.34] | Ser177 [4.54] |               |  |  |
| Opioid delta receptor, complex with tetrapeptide DIPP-NH2, Human 4rwa |     |    |               |    |               |               |               |  |  |
| -6.2                                                                  | Chl | OH | Tyr130 [3.34] | OH | Tyr130 [3.34] | Ser177 [4.54] |               |  |  |

|                                                     |               |    |               |    |               |               |               |  |  |
|-----------------------------------------------------|---------------|----|---------------|----|---------------|---------------|---------------|--|--|
| Opioid kappa receptor complex with JDTC, Human 4djh |               |    |               |    |               |               |               |  |  |
| -7.3                                                | Chl           | OH | Tyr140 [3.34] | OH | Tyr140 [3.34] | Trp183 [4.50] | Ser187 [4.54] |  |  |
| -6.8                                                | Chl           | OH | Ser324 [7.47] | O  | Ser324 [7.47] | Leu325 [7.48] |               |  |  |
| -6.4                                                | Chl           | OH | Ser188 [4.55] | OG | Leu184 [4.51] | Ser188 [4.55] |               |  |  |
| -6.3                                                | Ser188 [4.55] | OG | Chl           | O  | Leu185 [4.52] | Ser188 [4.55] |               |  |  |
| -6.2                                                | Chl           | OH | Ser324 [7.47] | O  | Thr321 [7.43] | Ser324 [7.47] | Leu325 [7.48] |  |  |
| Opioid kappa receptor, Human 6b73                   |               |    |               |    |               |               |               |  |  |
| -7.8                                                | Chl           | OH | Ser188 [4.55] | OG | Leu184 [4.51] | Ser187 [4.54] | Ser188 [4.55] |  |  |
| -7.7                                                | Chl           | OH | Ser187 [4.54] | OG | Leu184 [4.51] | Ser187 [4.54] | Ser188 [4.55] |  |  |

|                                                                            |     |    |               |     |               |               |               |  |  |
|----------------------------------------------------------------------------|-----|----|---------------|-----|---------------|---------------|---------------|--|--|
| Opioid mu receptor, a dimer, complex with morphinan antagonist, Mouse 4dkl |     |    |               |     |               |               |               |  |  |
| -6.7                                                                       | Chl | OH | Tyr149 [3.34] | OH  | Tyr149 [3.34] | Ser196 [4.54] |               |  |  |
| -5.8                                                                       | Chl | OH | Ser119 [2.55] | OG  | Ala115 [2.51] | Leu116 [2.52] | Ser119 [2.55] |  |  |
| Opioid mu receptor, bound to agonist BU72, Mouse 5c1m                      |     |    |               |     |               |               |               |  |  |
| -6.6                                                                       | Chl | OH | Thr153 [3.38] | OG1 | Tyr149 [3.34] | Asn150 [3.35] | Thr153 [3.38] |  |  |
| -5.9                                                                       | Chl | OH | Thr327 [7.44] | OG1 | Ala323 [7.40] | Leu324 [7.41] | Thr327 [7.44] |  |  |

|                                    |  |  |  |  |  |  |  |  |  |
|------------------------------------|--|--|--|--|--|--|--|--|--|
| Orexin receptor type 1, Human 4zjc |  |  |  |  |  |  |  |  |  |
| None                               |  |  |  |  |  |  |  |  |  |

|                                                     |  |  |  |  |  |  |  |  |  |
|-----------------------------------------------------|--|--|--|--|--|--|--|--|--|
| Orexin receptor type 2, Human, 4s0v                 |  |  |  |  |  |  |  |  |  |
| None                                                |  |  |  |  |  |  |  |  |  |
| Orexin receptor type 2 plus antagonist, Human, 5wqc |  |  |  |  |  |  |  |  |  |
| None                                                |  |  |  |  |  |  |  |  |  |
| Orexin receptor type 2 plus antagonist, Human, 5ws3 |  |  |  |  |  |  |  |  |  |
| None                                                |  |  |  |  |  |  |  |  |  |

|                                                   |     |    |               |    |               |               |  |  |  |
|---------------------------------------------------|-----|----|---------------|----|---------------|---------------|--|--|--|
| P2Y purinoceptor 1, complex with BPTU, Human 4xnv |     |    |               |    |               |               |  |  |  |
| -6.2                                              | Chl | OH | Ser272 [6.47] | OG | Ser272 [6.47] | Asn316 [7.45] |  |  |  |

| E <sup>1</sup>                                       | Donor | Acceptor | Local Residues (within 3 Å of a cholesterol –OH group) |  |  |  |  |  |  |
|------------------------------------------------------|-------|----------|--------------------------------------------------------|--|--|--|--|--|--|
| P2Y purinoceptor 1, complex with MRS2500, Human 4xnw |       |          |                                                        |  |  |  |  |  |  |
| None                                                 |       |          |                                                        |  |  |  |  |  |  |

| P2Y purinoceptor 12, complex with antithrombotic drug, Human 4ntj   |     |    |               |     |               |               |               |  |  |
|---------------------------------------------------------------------|-----|----|---------------|-----|---------------|---------------|---------------|--|--|
| -7.2                                                                | Chl | OH | Leu75 [2.55]  | O   | Leu72 [2.52]  | Leu75 [2.55]  | Thr76 [2.56]  |  |  |
|                                                                     | Chl | OH | Thr76 [2.56]  | OG1 |               |               |               |  |  |
| -6.9                                                                | Chl | OH | Ser113 [3.41] | OG  | Ser113 [3.41] | Asn201 [5.50] |               |  |  |
| -6.3                                                                | Chl | OH | Thr76 [2.56]  | OG1 | Leu72 [2.52]  | Thr76 [2.56]  | Ile103 [3.31] |  |  |
| P2Y purinoceptor 12, complex with bound agonist 2MeSADP, Human 4pxz |     |    |               |     |               |               |               |  |  |
| -7.1                                                                | Chl | OH | Leu72 [2.52]  | O   | Leu72 [2.52]  | Thr76 [2.56]  |               |  |  |
|                                                                     | Chl | OH | Thr76 [2.56]  | OG1 |               |               |               |  |  |
| -7.1                                                                | Chl | OH | Leu72 [2.52]  | O   | Leu72 [2.52]  | Leu75 [2.55]  | Thr76 [2.56]  |  |  |
|                                                                     | Chl | OH | Thr76 [2.56]  | OG1 |               |               |               |  |  |
| -5.5                                                                | Chl | OH | Leu75 [2.55]  | O   | Leu75 [2.55]  | Thr76 [2.56]  |               |  |  |
|                                                                     | Chl | OH | Thr76 [2.56]  | OG1 |               |               |               |  |  |

| Sphingosine 1-phosphate (S1P) receptor 1, Human 3v2y |     |    |               |     |               |               |               |  |  |
|------------------------------------------------------|-----|----|---------------|-----|---------------|---------------|---------------|--|--|
| -7.0                                                 | Chl | OH | Ser216 [2.53] | OG  | Leu212 [5.49] | Ser216 [2.53] |               |  |  |
| -6.6                                                 | Chl | OH | Thr211 [5.48] | OG1 | Thr208 [5.45] | Thr211 [5.48] | Leu212 [5.49] |  |  |
| -6.3                                                 | Chl | OH | Glu62 [1.49]  | OE1 | Phe58 [1.45]  | Glu62 [1.49]  | Gly305 [7.47] |  |  |

| Thrombin (proteinase-activated) receptor 1, PAR1 with antagonist vorapaxar, Human 3vw7 |     |    |               |   |               |               |  |  |  |
|----------------------------------------------------------------------------------------|-----|----|---------------|---|---------------|---------------|--|--|--|
| -5.5                                                                                   | Chl | OH | Leu150 [2.52] | O | Leu150 [2.52] | Phe151 [2.53] |  |  |  |

| Viral GPCR US28, complex with fractalkine, Human herpesvirus 4xt3              |     |    |               |     |               |               |               |  |  |
|--------------------------------------------------------------------------------|-----|----|---------------|-----|---------------|---------------|---------------|--|--|
| None                                                                           |     |    |               |     |               |               |               |  |  |
| Viral GPCR US28, complex with fractalkine and nanobody, Human herpesvirus 4xt1 |     |    |               |     |               |               |               |  |  |
| -5.7                                                                           | Chl | OH | Glu191 [5.41] | OE2 | Glu191 [5.41] | Leu194 [5.44] | Gly195 [5.45] |  |  |

| Rhodopsin and Opsin <sup>2</sup>         |  |  |  |  |  |  |  |  |  |
|------------------------------------------|--|--|--|--|--|--|--|--|--|
| Rhodopsin, Bovine 1f88                   |  |  |  |  |  |  |  |  |  |
| None                                     |  |  |  |  |  |  |  |  |  |
| Rhodopsin, Bovine 1l9h                   |  |  |  |  |  |  |  |  |  |
| None                                     |  |  |  |  |  |  |  |  |  |
| Rhodopsin, Bovine 1gzx                   |  |  |  |  |  |  |  |  |  |
| None                                     |  |  |  |  |  |  |  |  |  |
| Rhodopsin, Bovine 1hxx                   |  |  |  |  |  |  |  |  |  |
| None                                     |  |  |  |  |  |  |  |  |  |
| Rhodopsin, Bovine 3c9l                   |  |  |  |  |  |  |  |  |  |
| None                                     |  |  |  |  |  |  |  |  |  |
| Rhodopsin, Bovine 1u19                   |  |  |  |  |  |  |  |  |  |
| None                                     |  |  |  |  |  |  |  |  |  |
| Rhodopsin, with beta-ionone, Bovine 3oax |  |  |  |  |  |  |  |  |  |

| E <sup>1</sup>                                                                               | Donor | Acceptor | Local Residues (within 3 Å of a cholesterol –OH group) |  |  |  |  |  |  |
|----------------------------------------------------------------------------------------------|-------|----------|--------------------------------------------------------|--|--|--|--|--|--|
| None                                                                                         |       |          |                                                        |  |  |  |  |  |  |
| Rhodopsin, active (meta-II), without transducin peptide, Bovine 3pxo                         |       |          |                                                        |  |  |  |  |  |  |
| None                                                                                         |       |          |                                                        |  |  |  |  |  |  |
| Rhodopsin, active (meta-II), with C-terminal fragment of G-alpha, Bovine 3pqr                |       |          |                                                        |  |  |  |  |  |  |
| None                                                                                         |       |          |                                                        |  |  |  |  |  |  |
| Rhodopsin, constitutively active (meta-II), with C-terminal fragment of G-alpha, Bovine 4a4m |       |          |                                                        |  |  |  |  |  |  |
| None                                                                                         |       |          |                                                        |  |  |  |  |  |  |
| Rhodopsin, in agonist-induced active state, Bovine 2x72                                      |       |          |                                                        |  |  |  |  |  |  |
| None                                                                                         |       |          |                                                        |  |  |  |  |  |  |
| Rhodopsin, complex with arrestin, Human 4zvj                                                 |       |          |                                                        |  |  |  |  |  |  |
| None                                                                                         |       |          |                                                        |  |  |  |  |  |  |
| Rhodopsin, complex with arrestin, Human, 5w0p                                                |       |          |                                                        |  |  |  |  |  |  |
| None                                                                                         |       |          |                                                        |  |  |  |  |  |  |

|                                                                  |               |     |               |     |               |               |               |  |  |
|------------------------------------------------------------------|---------------|-----|---------------|-----|---------------|---------------|---------------|--|--|
| Opsin retinal-free state, Bovine, 5te3                           |               |     |               |     |               |               |               |  |  |
| None                                                             |               |     |               |     |               |               |               |  |  |
| Opsin, Bovine 5wkt                                               |               |     |               |     |               |               |               |  |  |
| None                                                             |               |     |               |     |               |               |               |  |  |
| Opsin retinal-free state, Bovine 3cap                            |               |     |               |     |               |               |               |  |  |
| -6.0                                                             | Thr297 [7.43] | OG1 | Chl           | O   | Thr297 [7.43] | Val300 [7.47] | Tyr301 [7.48] |  |  |
| -6.0                                                             | Chl           | OH  | Thr297 [7.43] | OG1 | Thr297 [7.43] | Tyr301 [7.48] |               |  |  |
|                                                                  | Thr297 [7.43] | OG1 | Chl           | O   |               |               |               |  |  |
| Opsin retinal-free state with bound G-alpha peptide, Bovine 4j4q |               |     |               |     |               |               |               |  |  |
| None                                                             |               |     |               |     |               |               |               |  |  |
| Opsin retinal-free state with bound G-alpha peptide, Bovine 4x1h |               |     |               |     |               |               |               |  |  |
| None                                                             |               |     |               |     |               |               |               |  |  |
| Opsin retinal-free state with bound ArrFL-1, Bovine 4pxf         |               |     |               |     |               |               |               |  |  |
| None                                                             |               |     |               |     |               |               |               |  |  |
| Opsin activated state with bound G-alpha peptide, Bovine 3dqb    |               |     |               |     |               |               |               |  |  |
| None                                                             |               |     |               |     |               |               |               |  |  |

|                                                                              |               |    |               |    |               |               |               |              |  |
|------------------------------------------------------------------------------|---------------|----|---------------|----|---------------|---------------|---------------|--------------|--|
| Squid rhodopsin, complex with 11-cis retinal, Japanese flying squid 2z73     |               |    |               |    |               |               |               |              |  |
| -8.4                                                                         | Chl           | OH | Leu85 [2.55]  | O  | Gly45 [1.43]  | Ser84 [2.54]  | Leu85 [2.55]  | Phe89 [2.59] |  |
|                                                                              | Chl           | OH | Ser84 [2.54]  | O  |               |               |               |              |  |
|                                                                              | Phe89 [2.59]  | N  | Chl           | O  |               |               |               |              |  |
| -5.8                                                                         | Chl           | OH | Ser275 [6.49] | OG | Leu271 [6.45] | Ser275 [6.49] |               |              |  |
| -5.7                                                                         | Ser273 [6.47] | OG | Chl           | O  | Gln269 [6.43] | Leu272 [6.46] | Ser273 [6.47] |              |  |
| Squid rhodopsin, complex with 9-cis isorhodopsin, Japanese flying squid 3ayn |               |    |               |    |               |               |               |              |  |
| -7.3                                                                         | Chl           | OH | Leu85 [2.55]  | O  | Ser84 [2.54]  | Leu85 [2.55]  | Phe89 [2.59]  |              |  |



| E <sup>1</sup> | Donor | Acceptor | Local Residues (within 3 Å of a cholesterol –OH group) |  |  |  |  |  |  |
|----------------|-------|----------|--------------------------------------------------------|--|--|--|--|--|--|
|----------------|-------|----------|--------------------------------------------------------|--|--|--|--|--|--|

**GPCR Class B<sup>3</sup>**

| Corticotropin-releasing factor receptor 1 (CRF1R) with bound antagonist, Human 4k5y  |               |    |               |     |               |               |               |  |  |  |
|--------------------------------------------------------------------------------------|---------------|----|---------------|-----|---------------|---------------|---------------|--|--|--|
| -6.7                                                                                 | Chl           | OH | Thr168 [2.63] | OG1 | Leu164 [2.59] | Ala167 [2.62] | Thr168 [2.63] |  |  |  |
| -5.7                                                                                 | Chl           | OH | Tyr197 [3.38] | OH  | Tyr197 [3.38] | Trp236 [4.50] |               |  |  |  |
| Corticotropin-releasing factor receptor 1, (CRF1R) with bound antagonist, Human 4z9g |               |    |               |     |               |               |               |  |  |  |
| -5.9                                                                                 | Chl           | OH | Thr168 [2.63] | OG1 | Leu164 [2.59] | Thr168 [2.63] |               |  |  |  |
| -5.9                                                                                 | Chl           | OH | Tyr197 [3.38] | OH  | Tyr197 [3.38] | Trp236 [4.50] |               |  |  |  |
| -5.8                                                                                 | Chl           | OH | Thr168 [2.63] | OG1 | Leu164 [2.59] | Ala167 [2.62] | Thr168 [2.63] |  |  |  |
| Glucagon receptor, Human 4l6r                                                        |               |    |               |     |               |               |               |  |  |  |
| -8.9                                                                                 | Chl           | OH | Ser189 [2.62] | OG  | Leu186 [2.59] | Ser189 [2.62] | Ser190 [2.63] |  |  |  |
|                                                                                      | Chl           | OH | Ser190 [2.63] | OG  |               |               |               |  |  |  |
| -8.8                                                                                 | Chl           | OH | Leu388 [7.45] | O   | Leu388 [7.45] | Phe391 [7.48] | Gln392 [7.49] |  |  |  |
|                                                                                      | Chl           | OH | Phe391 [7.48] | O   |               |               |               |  |  |  |
| -7.4                                                                                 | Chl           | OH | Leu388 [7.45] | O   | His361 [6.52] | Leu388 [7.45] | Gln392 [7.49] |  |  |  |
| Glucagon receptor, Human 5xez                                                        |               |    |               |     |               |               |               |  |  |  |
| -6.4                                                                                 | Chl           | OH | Ser189 [2.62] | OG  | Leu186 [2.59] | Ser189 [2.62] | Ser190 [2.63] |  |  |  |
|                                                                                      | Ser189 [2.62] | OG | Chl           | O   |               |               |               |  |  |  |
| -5.9                                                                                 | Chl           | OH | Gly359 [6.50] | O   | Gly359 [6.50] | Val360 [6.51] |               |  |  |  |
| Glucagon receptor, Human 5xf1                                                        |               |    |               |     |               |               |               |  |  |  |
| -6.5                                                                                 | Chl           | OH | Leu388 [7.45] | O   | Leu388 [7.45] | Phe391 [7.48] | Gln392 [7.49] |  |  |  |
| Glucagon receptor, with antagonist MK-0893, Human 5ee7                               |               |    |               |     |               |               |               |  |  |  |
| -5.6                                                                                 | Ser189 [2.62] | OG | Chl           | O   | Ser189 [2.62] |               |               |  |  |  |
| Glucagon-like peptide receptor (GLP-1R) complex with NNL0640, Human 5vex             |               |    |               |     |               |               |               |  |  |  |
| -6.8                                                                                 | Chl           | OH | Leu279 [4.55] | O   | Leu279 [4.55] |               |               |  |  |  |
| -6.1                                                                                 | Chl           | OH | Phe390 [7.45] | O   | Phe390 [7.45] | Phe393 [7.48] | Gln394 [7.49] |  |  |  |
| Glucagon-like peptide receptor (GLP-1R) complex with PF-06372222, Human 5vew         |               |    |               |     |               |               |               |  |  |  |
| -6.3                                                                                 | Chl           | OH | Leu279 [4.55] | O   | Leu279 [4.55] |               |               |  |  |  |

**GPCR Class C<sup>4</sup>**

| Metabotropic glutamate receptor 1, Human 4or2 |     |    |               |     |               |               |  |  |  |  |
|-----------------------------------------------|-----|----|---------------|-----|---------------|---------------|--|--|--|--|
| -5.7                                          | Chl | OH | Ser715 [4.41] | OG  | Ser715 [4.41] | Thr719 [4.45] |  |  |  |  |
|                                               | Chl | OH | Thr719 [4.45] | OG1 |               |               |  |  |  |  |
| Metabotropic glutamate receptor 5, Human 4oo9 |     |    |               |     |               |               |  |  |  |  |
| None                                          |     |    |               |     |               |               |  |  |  |  |

**GPCR Class F<sup>5</sup>**

| Smoothered (SMO) receptor with bound antagonist, LY2940680, Human 4jkv |     |    |               |    |               |               |  |  |  |  |
|------------------------------------------------------------------------|-----|----|---------------|----|---------------|---------------|--|--|--|--|
| -5.9                                                                   | Chl | OH | Ser366 [4.51] | OG | Leu362 [4.47] | Ser366 [4.51] |  |  |  |  |

| E <sup>1</sup>                                                    | Donor         | Acceptor | Local Residues (within 3 Å of a cholesterol –OH group) |    |               |               |               |               |  |
|-------------------------------------------------------------------|---------------|----------|--------------------------------------------------------|----|---------------|---------------|---------------|---------------|--|
| Smoothened (SMO) receptor with bound SANT-1, Human 4n4w           |               |          |                                                        |    |               |               |               |               |  |
| -6.0                                                              | Chl           | OH       | Tyr323 [3.34]                                          | OH | Tyr323 [3.34] |               |               |               |  |
| Smoothened (SMO) receptor with bound SAG1.5, Human 4qjn           |               |          |                                                        |    |               |               |               |               |  |
| -6.1                                                              | Tyr323 [3.34] | OH       | Chl                                                    | O  | Tyr323 [3.34] |               |               |               |  |
| -5.8                                                              | Chl           | OH       | Ser366 [4.51]                                          | OG | Ser366 [4.51] | Leu367 [4.52] |               |               |  |
| Smoothened (SMO) receptor with bound ANTA XV, Human 4qim          |               |          |                                                        |    |               |               |               |               |  |
| None                                                              |               |          |                                                        |    |               |               |               |               |  |
| Smoothened (SMO) receptor with bound cyclopamine, Human 4o9r      |               |          |                                                        |    |               |               |               |               |  |
| -5.6                                                              | Chl           | OH       | Ser468 [6.49]                                          | OG | Leu464 [6.45] | Ile465 [6.46] | Ser468 [6.49] |               |  |
| Smoothened (SMO) receptor in complex with cholesterol, Human 5l7d |               |          |                                                        |    |               |               |               |               |  |
| -6.7                                                              | Ala324 [3.35] | N        | Chl                                                    | O  | Val319 [3.30] | Ile320 [3.31] | Tyr323 [3.34] | Ala324 [3.35] |  |
|                                                                   | Chl           | OH       | Ile320 [3.31]                                          | O  |               |               |               |               |  |
| -6.0                                                              | Chl           | OH       | Leu458 [6.39]                                          | O  | Phe457 [6.38] | Leu458 [6.39] | Gly461 [6.42] |               |  |
| -5.8                                                              | Chl           | OH       | Tyr323 [3.34]                                          | OH | Tyr323 [3.34] | Trp365 [4.50] |               |               |  |
| -5.8                                                              | Phe462 [6.43] | N        | Chl                                                    | O  | Leu458 [6.39] | Gly461 [6.42] | Phe462 [6.43] |               |  |
| Smoothened (SMO) receptor with bound vismodegib, Human 5l7i       |               |          |                                                        |    |               |               |               |               |  |
| -6.4                                                              | Ala324 [3.35] | N        | Chl                                                    | O  | Val319 [3.30] | Ile320 [3.31] | Tyr323 [3.34] | Ala324 [3.35] |  |
|                                                                   | Chl           | OH       | Ile320 [3.31]                                          | O  |               |               |               |               |  |

#### GPCR Adiponectin Receptor<sup>6</sup>

|                                              |     |    |            |     |            |            |            |  |  |
|----------------------------------------------|-----|----|------------|-----|------------|------------|------------|--|--|
| AdipoR1, Human 3wvx                          |     |    |            |     |            |            |            |  |  |
| -6.0                                         | Chl | OH | Thr312 [6] | OG1 | Val308 [6] | Thr312 [6] |            |  |  |
| AdipoR1, open conformation, Human, 5lxx      |     |    |            |     |            |            |            |  |  |
| -7.8                                         | Chl | OH | Ser219 [3] | OG  | Leu215 [3] | Ile216 [3] | Ser219 [3] |  |  |
| -6.3                                         | Chl | OH | Thr312 [6] | OG1 | Val308 [6] | Ile311 [6] | Thr312 [6] |  |  |
| AdipoR2, Human, 5lwy                         |     |    |            |     |            |            |            |  |  |
| -6.0                                         | Chl | OH | Ser319 [6] | OG  | Met315 [6] | Ala318 [6] | Ser319 [6] |  |  |
| AdipoR2 complex with fatty acid, Human, 5lxx |     |    |            |     |            |            |            |  |  |
| -6.4                                         | Chl | OH | Ser319 [6] | OG  | Met315 [6] | Ala318 [6] | Ser319 [6] |  |  |
| AdipoR2 complex with fatty acid, Human, 5lxa |     |    |            |     |            |            |            |  |  |
| -6.6                                         | Chl | OH | Thr323 [6] | OG1 | Ser319 [6] | Thr323 [6] |            |  |  |
| -6.4                                         | Chl | OH | Ser319 [6] | OG  | Met315 [6] | Ser319 [6] |            |  |  |

1. kcal mol<sup>-1</sup>, with molar concentration units.
2. With residue numbers in the Ballesteros-Weinstein numbering system (1).
3. With residue numbers in the Wootten numbering system (2).
4. With residue numbers in the Pin numbering system (3).
5. With residue numbers in the Wang numbering system (4).
6. With TM helix numbers.

**TABLE S2 Channels**

[A-J refers to TM subunits as given in the PDB file, followed by the TM helix number; P Pore Helix].

| E <sup>1</sup>                                                                      | Donor       | Acceptor | Local Residues (within 3 Å of a cholesterol –OH group) |     |               |               |               |             |
|-------------------------------------------------------------------------------------|-------------|----------|--------------------------------------------------------|-----|---------------|---------------|---------------|-------------|
| <b>Ion Channels</b>                                                                 |             |          |                                                        |     |               |               |               |             |
| <b>Potassium Channels</b>                                                           |             |          |                                                        |     |               |               |               |             |
| Two-pore domain TWIK-1 human, 3ukm                                                  |             |          |                                                        |     |               |               |               |             |
| -8.3                                                                                | Chl         | OH       | Thr225 [A P2]                                          | OG1 | Ser224 [A P2] | Thr225 [A P2] |               |             |
| -8.2                                                                                | Chl         | OH       | Thr225 [B P2]                                          | OG1 | Thr117 [A P1] | Ser224 [B P2] | Thr225 [B P2] |             |
| -7.6                                                                                | Chl         | OH       | Leu115 [A P1]                                          | O   | Leu115 [A P1] | Ile142 [A2]   |               |             |
| Two-pore domain TRAAK in non-conductive down state, human, 3um7                     |             |          |                                                        |     |               |               |               |             |
| -8.4                                                                                | Chl         | OH       | Thr238 [B P2]                                          | OG1 | Thr129 [A P1] | Thr237 [B P2] | Thr238 [B P2] |             |
| -8.1                                                                                | Chl         | OH       | Ser45 [B1]                                             | OG  | Tyr42 [B1]    | Ser45 [B1]    | Gly46 [B1]    |             |
| -7.0                                                                                | Chl         | OH       | Thr212 [B3]                                            | OG1 | Leu207 [B3]   | Leu211 [B3]   | Thr212 [B3]   |             |
| -7.0                                                                                | Chl         | OH       | Leu151 [B2]                                            | O   | Leu151 [B2]   |               |               |             |
| -6.5                                                                                | Chl         | OH       | Leu208 [A3]                                            | O   | Leu208 [A3]   | Pro213 [A3]   |               |             |
| Two-pore domain TRAAK in non-conductive down state in K <sup>+</sup> , human, 4wff  |             |          |                                                        |     |               |               |               |             |
| -6.6                                                                                | Chl         | OH       | Leu236 [A P2]                                          | O   | Leu236 [A P2] |               |               |             |
| -6.6                                                                                | Chl         | OH       | Leu151 [A2]                                            | O   | Leu151 [A2]   |               |               |             |
| -6.4                                                                                | Chl         | OH       | Ile127 [B P1]                                          | O   | Ile127 [B P1] | Ile154 [B2]   | Phe157 [B2]   | Gly158 [B2] |
| -6.4                                                                                | Chl         | OH       | Tyr42 [A1]                                             | OH  | Tyr42 [A1]    | Phe148 [B2]   | Tyr149 [B2]   |             |
| Two-pore domain TRAAK in non-conductive down state in TI <sup>+</sup> , human, 4wfh |             |          |                                                        |     |               |               |               |             |
| -9.9                                                                                | Chl         | OH       | Ile127 [B P1]                                          | O   | Ile154 [B2]   | Gly158 [B2]   |               |             |
| -8.5                                                                                | Chl         | OH       | Thr237 [A P2]                                          | O   | Thr237 [A P2] | Thr238 [A P2] |               |             |
|                                                                                     | Chl         | OH       | Thr238 [A P2]                                          | OG1 |               |               |               |             |
| -8.3                                                                                | Chl         | OH       | Leu236 [A P2]                                          | O   | Leu236 [A P2] | Thr237 [A P2] |               |             |
| -8                                                                                  | Chl         | OH       | Leu151 [A2]                                            | O   | Leu151 [A2]   |               |               |             |
| -6.3                                                                                | Chl         | OH       | Tyr42 [A1]                                             | OH  | Tyr42 [A1]    | Phe148 [B2]   | Tyr149 [B2]   |             |
| -5.9                                                                                | Chl         | OH       | Leu208 [B3]                                            | O   | Leu208 [B3]   | Pro213 [B3]   | Trp264 [B4]   |             |
| Two-pore domain TRAAK in conductive up state in K <sup>+</sup> , human, 4wfe        |             |          |                                                        |     |               |               |               |             |
| 6.5                                                                                 | Chl         | OH       | Tyr42 [B1]                                             | OH  | Phe148 [A2]   | Tyr149 [A2]   | Tyr42 [B1]    |             |
| -6.1                                                                                | Chl         | OH       | Tyr271 [A4]                                            | OH  | Cys206 [A3]   | Tyr271 [A4]   |               |             |
|                                                                                     | Tyr271 [A4] | OH       | Chl                                                    | OH  |               |               |               |             |
| Two-pore domain TRAAK in conductive up state in TI <sup>+</sup> , human, 4wfg       |             |          |                                                        |     |               |               |               |             |
| -6.6                                                                                | Tyr42 [A1]  | OH       | Chl                                                    | OH  | Tyr42 [A1]    | Phe148 [B2]   | Tyr149 [B2]   |             |
| -6.3                                                                                | Chl         | OH       | Tyr42 [A1]                                             | OH  | Tyr42 [A1]    | Phe148 [B2]   | Tyr149 [B2]   |             |
|                                                                                     | Tyr42 [A1]  | OH       | Chl                                                    | OH  |               |               |               |             |
| Two-pore domain TRAAK, domain-swapped, closed fenestrations, human, 4i9w            |             |          |                                                        |     |               |               |               |             |
| -6.8                                                                                | Chl         | OH       | Tyr42 [A1]                                             | OH  | Tyr42 [A1]    | Phe148 [B2]   | Tyr149 [B2]   |             |

| E <sup>1</sup>                                                                  | Donor |    | Acceptor      |     | Local Residues (within 3 Å of a cholesterol –OH group) |               |               |            |
|---------------------------------------------------------------------------------|-------|----|---------------|-----|--------------------------------------------------------|---------------|---------------|------------|
| Two-pore domain TREK-1 up state human, 4twk                                     |       |    |               |     |                                                        |               |               |            |
| -7.5                                                                            | Chl   | OH | Tyr284 [A4]   | OH  | Ile215 [A3]                                            | Tyr284 [A4]   |               |            |
| -6.1                                                                            | Chl   | OH | Tyr57 [B1]    | OH  | Ile161 [A2]                                            | Tyr162 [A2]   | Leu165 [A2]   | Tyr57 [B1] |
| Two-pore domain TREK-1 up state mouse, 5vk5                                     |       |    |               |     |                                                        |               |               |            |
| -6.2                                                                            | Chl   | OH | Tyr57 [A1]    | OH  | Tyr57 [A1]                                             | Ile161 [B2]   | Tyr162 [B2]   |            |
| -5.9                                                                            | Chl   | OH | Leu221 [A3]   | O   | Leu221 [A3]                                            | Pro226 [A1]   | Trp277 [A4]   |            |
| Two-pore domain TREK-1 up state mouse, 5vkn                                     |       |    |               |     |                                                        |               |               |            |
| -5.6                                                                            | Chl   | OH | Tyr284 [A4]   | OH  | Cys219 [A3]                                            | Tyr284 [A4]   |               |            |
| -5.5                                                                            | Chl   | OH | Leu221 [A3]   | O   | Leu221 [A3]                                            | Phe222 [A3]   |               |            |
| Two-pore domain TREK-1 complex with ML402, mouse, 5vkp                          |       |    |               |     |                                                        |               |               |            |
| -5.6                                                                            | Chl   | OH | Leu221 [A3]   | O   | Leu221 [A3]                                            | Trp277 [A4]   |               |            |
| Two-pore domain TREK-2 up state human, 4bw5                                     |       |    |               |     |                                                        |               |               |            |
| -6.6                                                                            | Chl   | OH | Tyr87 [A1]    | OH  | Tyr87 [A1]                                             | Leu191 [B2]   | Tyr192 [B2]   | Tyr87 [B1] |
| Two-pore domain TREK-2 down state human (res. 3.8 Å), 4xdj                      |       |    |               |     |                                                        |               |               |            |
| -8.1                                                                            | Chl   | OH | Thr281 [A P2] | OG1 | Thr280 [A P2]                                          | Thr281 [A P2] |               |            |
| -7.8                                                                            | Chl   | OH | Ile194 [A2]   | O   | Ile194 [A2]                                            |               |               |            |
| -7.6                                                                            | Chl   | OH | Leu279 [B P2] | O   | Leu279 [B P2]                                          |               |               |            |
| Two-pore domain TREK-2 down state, Br-fluoxetine bound, human, 4xdl             |       |    |               |     |                                                        |               |               |            |
| -8.2                                                                            | Chl   | OH | Ile194 [C2]   | O   | Ile194 [C2]                                            |               |               |            |
| -8.2                                                                            | Chl   | OH | Thr281 [D P2] | OG1 | Thr280 [D P2]                                          | Thr281 [D P2] |               |            |
| Two-pore domain TREK-2 down state, norfluoxetine bound (res 3.6 Å), human, 4xdk |       |    |               |     |                                                        |               |               |            |
| -8.4                                                                            | Chl   | OH | Ile170 [A P1] | O   | Ile197 [A2]                                            | Gly201 [A2]   |               |            |
| -8.2                                                                            | Chl   | OH | Leu279 [B P2] | O   | Leu279 [B P2]                                          | Thr280 [B P2] | Thr281 [B P2] |            |

|                                                                                                   |     |    |             |     |             |             |              |             |
|---------------------------------------------------------------------------------------------------|-----|----|-------------|-----|-------------|-------------|--------------|-------------|
| Voltage-gated channel Kv1.2, rat, 3lut                                                            |     |    |             |     |             |             |              |             |
| None                                                                                              |     |    |             |     |             |             |              |             |
| Voltage-gated channel Kv1.2, rat, 2a79                                                            |     |    |             |     |             |             |              |             |
| -8.0                                                                                              | Chl | OH | Thr401 [A6] | OG1 | Phe334 [A5] | Thr401 [A6] |              |             |
| -7.9                                                                                              | Chl | OH | Thr401 [A6] | OG1 | Ala397 [A5] | Thr401 [A6] |              |             |
| Voltage-gated channel Kv1.2/Kv2.1 paddle chimera [PDB numbering changed to match 2a79], rat, 2r9r |     |    |             |     |             |             |              |             |
| -6.3                                                                                              | Chl | OH | Thr401 [A6] | OG1 | Phe334 [A5] | Gly338 [A5] | Thr401 [A6]  |             |
| Voltage-gated channel Kv1.2/Kv2.1 paddle chimera [PDB numbering changed to match 2a79] rat, 3lnm  |     |    |             |     |             |             |              |             |
| -7.8                                                                                              | Chl | OH | Thr401 [A6] | OG1 | Phe334 [A5] | Gly338 [A5] | Met372 [A P] | Thr401 [A6] |
| Voltage-gated channel Kv1.2/Kv2.1 paddle chimera, inactivated V410W mutant, rat, 5wie             |     |    |             |     |             |             |              |             |
| None                                                                                              |     |    |             |     |             |             |              |             |

|                                                             |            |     |              |   |              |              |              |             |
|-------------------------------------------------------------|------------|-----|--------------|---|--------------|--------------|--------------|-------------|
| Inward-rectifier Kir 2.2 chicken, 3jyc                      |            |     |              |   |              |              |              |             |
| -6.7                                                        | Trp94 [A1] | NE1 | Chl          | O | Trp94 [A1]   | Gln141 [A P] |              |             |
| Inward-rectifier Kir 2.2 mutant apo form, 3spj              |            |     |              |   |              |              |              |             |
| -9.1                                                        | Chl        | OH  | Gln141 [A P] | O | Gln141 [A P] | Ser166 [A2]  | Gly169 [A2]  | Cys170 [A2] |
| -7.7                                                        | Trp94 [A1] | NE1 | Chl          | O | Phe90 [A1]   | Trp94 [A1]   | Gln141 [A P] |             |
| Inward-rectifier Kir 2.2 in complex with PIP2 chicken, 3spi |            |     |              |   |              |              |              |             |
| -7.0                                                        | Chl        | OH  | Gln141 [A P] | O | Gln141 [A P] | Ser166 [A2]  | Gly169 [A2]  | Cys170 [A2] |

| E <sup>1</sup>                                                     | Donor | Acceptor | Local Residues (within 3 Å of a cholesterol –OH group) |  |  |  |  |  |
|--------------------------------------------------------------------|-------|----------|--------------------------------------------------------|--|--|--|--|--|
| Inward-rectifier Kir 2.2 mutant in complex with PIP2 chicken, 3spg |       |          |                                                        |  |  |  |  |  |
| None                                                               |       |          |                                                        |  |  |  |  |  |
| Inward-rectifier Kir 2.2 mutant in complex with PIP2 chicken, 3sph |       |          |                                                        |  |  |  |  |  |
| None                                                               |       |          |                                                        |  |  |  |  |  |
| Inward-rectifier Kir 2.2 in complex with PPA chicken, 3sps         |       |          |                                                        |  |  |  |  |  |
| None                                                               |       |          |                                                        |  |  |  |  |  |
| Inward-rectifier Kir 2.2 K62W mutant chicken, 5kuk                 |       |          |                                                        |  |  |  |  |  |
| None                                                               |       |          |                                                        |  |  |  |  |  |

|                                                                               |             |    |              |     |              |              |             |  |
|-------------------------------------------------------------------------------|-------------|----|--------------|-----|--------------|--------------|-------------|--|
| G-protein gated channel, GIRK2 (Kir 3.2) wild type. mouse, 3syo               |             |    |              |     |              |              |             |  |
| -7.0                                                                          | Chl         | OH | Ser181 [A2]  | OG  | Ser177 [A2]  | Gly180 [A2]  | Ser181 [A2] |  |
| G-protein gated channel, GIRK2 (Kir 3.2) D228N mutant. mouse, 3syc            |             |    |              |     |              |              |             |  |
| -6.1                                                                          | Chl         | OH | Tyr102 [A1]  | OH  | Tyr102 [A1]  |              |             |  |
|                                                                               | Tyr102 [A1] | OH | Chl          | OH  |              |              |             |  |
| -6.0                                                                          | Chl         | OH | Glu152 [B P] | OE2 | Tyr102 [B1]  | Glu152 [B P] |             |  |
|                                                                               | Tyr102 [B1] | OH | Chl          | OH  |              |              |             |  |
| G-protein gated channel, GIRK2 (Kir 3.2) wild type plus PIP2, mouse, 3sya     |             |    |              |     |              |              |             |  |
| -7.2                                                                          | Chl         | OH | Ser181 [A2]  | OG  | Ser177 [A2]  | Ser181 [A2]  | Tyr102 [D1] |  |
| G-protein gated channel, GIRK2 (Kir 3.2) R201A mutant plus PIP2, mouse, 3syq  |             |    |              |     |              |              |             |  |
| -9.1                                                                          | Chl         | OH | Ser181 [C2]  | OG  | Ser177 [C2]  | Ser181 [C2]  |             |  |
| -9.1                                                                          | Chl         | OH | Glu152 [B P] | O   | Glu152 [B P] | Gly180 [B2]  |             |  |
|                                                                               | Chl         | OH | Gly180 [B2]  | O   |              |              |             |  |
| -7.9                                                                          | Chl         | OH | Ser177 [B2]  | O   | Ser177 [B2]  | Gly180 [B2]  | Ser181 [B2] |  |
|                                                                               | Chl         | OH | Ser181 [B2]  | OG  |              |              |             |  |
| -7.5                                                                          | Chl         | OH | Tyr102 [D1]  | OH  | Tyr102 [D1]  | Asn184 [D2]  |             |  |
|                                                                               | Tyr102 [D1] | OH | Chl          | OH  |              |              |             |  |
| G-protein gated channel, GIRK2 (Kir 3.2) plus G-protein subunits. mouse, 4kfm |             |    |              |     |              |              |             |  |
| -9.6                                                                          | Chl         | OH | Ser181 [F2]  | OG  | Ser177 [F2]  | Ser181 [F2]  |             |  |
| -8.9                                                                          | Chl         | OH | Glu152 [J P] | O   | Glu152 [J P] | Gly180 [J2]  |             |  |
|                                                                               | Chl         | OH | Glu152 [J P] | OE2 |              |              |             |  |
| -8.5                                                                          | Chl         | OH | Ser181 [A2]  | OG  | Ser181 [A2]  | Asn184 [J2]  |             |  |

|                                                    |     |    |            |    |            |            |            |  |
|----------------------------------------------------|-----|----|------------|----|------------|------------|------------|--|
| Calcium-activated channel Slo1 (BK) sea slug, 5tj6 |     |    |            |    |            |            |            |  |
| -7.5                                               | Chl | OH | Ser29 [A1] | OG | Thr26 [A1] | Ser29 [A1] | Gly30 [A1] |  |

|                                                                                |  |  |  |  |  |  |  |  |
|--------------------------------------------------------------------------------|--|--|--|--|--|--|--|--|
| Lysosomal K <sup>+</sup> -selective channel TMEM175 homolog, marine worm, 5vre |  |  |  |  |  |  |  |  |
| None                                                                           |  |  |  |  |  |  |  |  |

**Calcium-ion selective Channels**

|                                                                      |     |    |             |   |             |             |             |  |
|----------------------------------------------------------------------|-----|----|-------------|---|-------------|-------------|-------------|--|
| Orai calcium release-activated CRAC channel, Drosophila, 4hkr        |     |    |             |   |             |             |             |  |
| -6.8                                                                 | Chl | OH | Thr283 [A4] | O | Thr283 [A4] | Leu286 [A4] | Ile287 [A4] |  |
| Orai calcium release-activated CRAC channel mutant, Drosophila, 4hks |     |    |             |   |             |             |             |  |
| -6.6                                                                 | Chl | OH | Thr283 [A4] | O | Thr283 [A4] | Leu286 [A4] | Ile287 [A4] |  |

| E <sup>1</sup>                                     | Donor       | Acceptor | Local Residues (within 3 Å of a cholesterol –OH group) |     |             |              |             |  |
|----------------------------------------------------|-------------|----------|--------------------------------------------------------|-----|-------------|--------------|-------------|--|
| <b>Transient Receptor Potential (TRP) Channels</b> |             |          |                                                        |     |             |              |             |  |
| TRPM4 cation channel, apo state, human, 6bcj       |             |          |                                                        |     |             |              |             |  |
| None                                               |             |          |                                                        |     |             |              |             |  |
| TRPM4 cation channel, apo state, human, 6bcl       |             |          |                                                        |     |             |              |             |  |
| None                                               |             |          |                                                        |     |             |              |             |  |
| TRPM4 cation channel, ATP bound, human, 6bco       |             |          |                                                        |     |             |              |             |  |
| None                                               |             |          |                                                        |     |             |              |             |  |
| TRPM4 cation channel, ATP bound, human, 6bcq       |             |          |                                                        |     |             |              |             |  |
| None                                               |             |          |                                                        |     |             |              |             |  |
| TRPM4 cation channel, Ca-free, human, 6bqr         |             |          |                                                        |     |             |              |             |  |
| None                                               |             |          |                                                        |     |             |              |             |  |
| TRPM4 cation channel, Ca-bound, human, 6bqv        |             |          |                                                        |     |             |              |             |  |
| None                                               |             |          |                                                        |     |             |              |             |  |
| TRPML1, human, 5wj9                                |             |          |                                                        |     |             |              |             |  |
| -7.8                                               | Chl         | OH       | Tyr439 [A5]                                            | OH  | Tyr439 [A5] | Ser500 [A6]  |             |  |
| -6.9                                               | Chl         | OH       | Ser503 [A6]                                            | OG  | Tyr499 [A6] | Ser503 [A6]  |             |  |
| TRPML3, marmoset, 5w3s                             |             |          |                                                        |     |             |              |             |  |
| -7.1                                               | Chl         | OH       | Tyr491 [A6]                                            | OH  | Tyr491 [A6] | Ile455 [D P] |             |  |
|                                                    | Tyr491 [A6] | OH       | Chl                                                    | OH  |             |              |             |  |
| TRPV1 rat, 3j5p                                    |             |          |                                                        |     |             |              |             |  |
| -7.7                                               | Chl         | OH       | Thr550 [A4]                                            | OG1 | Met547 [A4] | Thr550 [A4]  | Asn551 [A4] |  |
| -7.5                                               | Chl         | OH       | Ser483 [A2]                                            | OG  | Ser483 [A2] | Gly484 [A2]  |             |  |
|                                                    | Ser483 [A2] | OG       | Chl                                                    | OH  |             |              |             |  |
| TRPV1 rat, 5irz                                    |             |          |                                                        |     |             |              |             |  |
| -8.2                                               | Chl         | OH       | Ser483 [A2]                                            | OG  | Ser483 [A2] | Gly484 [A2]  |             |  |
|                                                    | Ser483 [A2] | OG       | Chl                                                    | OH  |             |              |             |  |
| -8.0                                               | Chl         | OH       | Thr550 [A4]                                            | OG1 | Ala546 [A4] | Met547 [A4]  | Thr550 [A4] |  |
| TRPV1 complex with DkTx and RTX, rat, 5irx         |             |          |                                                        |     |             |              |             |  |
| -8.6                                               | Chl         | OH       | Thr550 [A4]                                            | OG1 | Ala546 [A4] | Met547 [A4]  | Thr550 [A4] |  |
| -6.9                                               | Chl         | OH       | Ser483 [A2]                                            | OG  | Ser483 [A2] | Gly484 [A2]  |             |  |
|                                                    | Ser483 [A2] | OG       | Chl                                                    | OH  | Ser483 [A2] | Gly484 [A2]  |             |  |
| TRPV1 complex with capsaicin, rat, 5is0            |             |          |                                                        |     |             |              |             |  |
| -8.7                                               | Chl         | OH       | Thr550 [A4]                                            | OG1 | Ala546 [A4] | Met547 [A4]  | Thr550 [A4] |  |
| -6.6                                               | Chl         | OH       | Ser483 [A2]                                            | OG  | Ile479 [A2] | Val482 [A2]  | Ser483 [A2] |  |
| TRPV6 rat, 5iwk                                    |             |          |                                                        |     |             |              |             |  |
| None                                               |             |          |                                                        |     |             |              |             |  |
| TRPV6 rat, 5wo6                                    |             |          |                                                        |     |             |              |             |  |
| -5.8                                               | Chl         | OH       | Thr430 [A3]                                            | OG1 | Val426 [A3] | Ile427 [A3]  | Thr430 [A3] |  |
| TRPV6 rat, 5wo7                                    |             |          |                                                        |     |             |              |             |  |
| -6.3                                               | Chl         | OH       | Val498 [A5]                                            | O   | Val498 [A5] | Val499 [A5]  | Gly502 [A5] |  |
| TRPV6-Del1, rat, 5wo8                              |             |          |                                                        |     |             |              |             |  |
| -6.1                                               | Chl         | OH       | Thr430 [A3]                                            | OG1 | Val426 [A3] | Ile427 [A3]  | Thr430 [A3] |  |

| E <sup>1</sup>                           | Donor       |    | Acceptor    |    | Local Residues (within 3 Å of a cholesterol –OH group) |             |             |             |
|------------------------------------------|-------------|----|-------------|----|--------------------------------------------------------|-------------|-------------|-------------|
| TRPV6, plus Ca <sup>2+</sup> , rat, 5wo9 |             |    |             |    |                                                        |             |             |             |
| -7.1                                     | Chl         | OH | Cys462 [A4] | O  | Trp461 [A4]                                            | Cys462 [A4] | Val464 [A4] | Met465 [A4] |
|                                          | Met465 [A4] | N  | Chl         | OH |                                                        |             |             |             |

|                                                     |             |    |             |     |             |             |  |  |
|-----------------------------------------------------|-------------|----|-------------|-----|-------------|-------------|--|--|
| PKD2 polycystic kidney disease channel, human, 5t4d |             |    |             |     |             |             |  |  |
| -6.7                                                | Chl         | OH | Thr663 [A6] | OG1 | Tyr611 [A5] | Thr663 [A6] |  |  |
|                                                     | Tyr611 [A5] | OH | Chl         | OH  |             |             |  |  |

#### Glutamate Receptors

|                                                                        |             |     |             |     |             |             |  |  |
|------------------------------------------------------------------------|-------------|-----|-------------|-----|-------------|-------------|--|--|
| GluA2 glutamate receptor (AMPA) apo form A, rat, 4u2p                  |             |     |             |     |             |             |  |  |
| -9.1                                                                   | Tyr533 [A1] | OH  | Chl         | OH  | Tyr533 [A1] | Arg599 [D2] |  |  |
| -8.2                                                                   | Chl         | OH  | Thr609 [A2] | OG1 | Trp605 [A2] | Thr609 [A2] |  |  |
| -7.3                                                                   | Chl         | OH  | Thr609 [A2] | OG1 | Trp605 [A2] | Thr609 [A2] |  |  |
|                                                                        | Trp605 [A2] | NE1 | Chl         | OH  |             |             |  |  |
| GluA2 glutamate receptor (AMPA) with kainate crystal form A, rat, 4u1w |             |     |             |     |             |             |  |  |
| -7.8                                                                   | Chl         | OH  | Thr609 [A2] | OG1 | Trp605 [A2] | Thr609 [A2] |  |  |
| -7.5                                                                   | Trp605 [A2] | NE1 | Chl         | OH  | Trp605 [A2] | Thr609 [A2] |  |  |
| GluA2 glutamate receptor (AMPA) with kainate crystal form B, rat, 4u1x |             |     |             |     |             |             |  |  |
| -7.6                                                                   | Chl         | OH  | Thr609 [A2] | OG1 | Thr609 [A2] |             |  |  |
| -6.8                                                                   | Chl         | OH  | Thr609 [A2] | OG1 | Thr609 [A2] | Trp606 [D2] |  |  |
| GluA2 glutamate receptor (AMPA) mutant with toxin etc, rat, 4u5b       |             |     |             |     |             |             |  |  |
| -9.2                                                                   | Tyr533 [C1] | OH  | Chl         | OH  | Arg599 [B2] | Tyr533 [C1] |  |  |
| -8.3                                                                   | Chl         | OH  | Thr609 [A2] | OG1 | Trp605 [A2] | Thr609 [A2] |  |  |
|                                                                        | Trp605 [A2] | NE1 | Chl         | OH  |             |             |  |  |
| -7.7                                                                   | Trp605 [A2] | NE1 | Chl         | OH  | Trp605 [A2] |             |  |  |

#### P2X channels

|                                                                               |     |    |             |     |             |             |             |  |
|-------------------------------------------------------------------------------|-----|----|-------------|-----|-------------|-------------|-------------|--|
| ATP-gated P2X3 channel closed apo state, human, 5svj                          |     |    |             |     |             |             |             |  |
| -6.9                                                                          | Chl | OH | Thr336 [A2] | OG1 | Gly333 [A2] | Thr336 [A2] |             |  |
| ATP-gated P2X3 channel ATP bound open state, human, 5svk                      |     |    |             |     |             |             |             |  |
| -7.7                                                                          | Chl | OH | Ser331 [A2] | OG  | Thr330 [A2] | Ser331 [A2] |             |  |
|                                                                               | Chl | OH | Thr330 [A2] | OG1 |             |             |             |  |
|                                                                               | Chl | OH | Thr330 [A2] | O   |             |             |             |  |
| -6.2                                                                          | Chl | OH | Ser36 [A1]  | OG1 | Leu33 [A1]  | Ser36 [A1]  | Tyr37 [A1]  |  |
| ATP-gated P2X3 channel ATP-bound, desensitized state, human, 5svl             |     |    |             |     |             |             |             |  |
| -8.9                                                                          | Chl | OH | Thr330 [A2] | OG1 | Thr330 [A2] | Ser331 [A2] |             |  |
| -8.9                                                                          | Chl | OH | Ser331 [A2] | OG  | Thr330 [A2] | Ser331 [A2] |             |  |
| ATP-gated P2X3 channel agonist bound desensitized state, human, 5svm          |     |    |             |     |             |             |             |  |
| -11.4                                                                         | Chl | OH | Ser331 [A2] | OG  | Ala327 [A2] | Thr330 [A2] | Ser331 [A2] |  |
|                                                                               | Chl | OH | Thr330 [A2] | OG1 |             |             |             |  |
| ATP-gated P2X3 channel agonist bound desensitized state, human, 5svp          |     |    |             |     |             |             |             |  |
| -11.4                                                                         | Chl | OH | Ser331 [A2] | OG  | Ala327 [A2] | Thr330 [A2] | Ser331 [A2] |  |
|                                                                               | Chl | OH | Thr330 [A2] | OG1 |             |             |             |  |
| ATP-gated P2X3 channel competitive antagonist bound closed state, human, 5svq |     |    |             |     |             |             |             |  |
| None                                                                          |     |    |             |     |             |             |             |  |

| E <sup>1</sup>                                                                | Donor       |     | Acceptor    |     | Local Residues (within 3 Å of a cholesterol –OH group) |             |             |            |
|-------------------------------------------------------------------------------|-------------|-----|-------------|-----|--------------------------------------------------------|-------------|-------------|------------|
| ATP-gated P2X3 channel competitive antagonist bound closed state, human, 5svr |             |     |             |     |                                                        |             |             |            |
| -6.6                                                                          | Chl         | OH  | Ser36 [A1]  | OG  | Ser36 [A1]                                             |             |             |            |
| -6.3                                                                          | Chl         | OH  | Thr336 [A2] | OG1 | Val332 [A2]                                            | Gly333 [A2] | Thr336 [A2] |            |
| ATP-gated P2X4 channel apo state, zebra fish, 3h9v                            |             |     |             |     |                                                        |             |             |            |
| None                                                                          |             |     |             |     |                                                        |             |             |            |
| ATP-gated P2X4 channel apo closed state, zebra fish, 3i5d                     |             |     |             |     |                                                        |             |             |            |
| None                                                                          |             |     |             |     |                                                        |             |             |            |
| ATP-gated P2X4 channel plus CTP open state, zebra fish, 5wzy                  |             |     |             |     |                                                        |             |             |            |
| -6.9                                                                          | Chl         | OH  | Ala344 [A2] | O   | Ala344 [A2]                                            | Ala347 [A2] | Leu348 [A2] |            |
| ATP-gated P2X4 channel ATP bound open state, zebra fish, 4dw1                 |             |     |             |     |                                                        |             |             |            |
| -7.3                                                                          | Chl         | OH  | Gly343 [A2] | O   | Gly343 [A2]                                            | Ala344 [A2] |             |            |
| ATP-gated P2X4 channel ATP-free closed state, zebra fish, 4dw0                |             |     |             |     |                                                        |             |             |            |
| None                                                                          |             |     |             |     |                                                        |             |             |            |
| ATP-gated P2X4 channel ATP bound open state, Gulf Coast tick, 5f1c            |             |     |             |     |                                                        |             |             |            |
| None                                                                          |             |     |             |     |                                                        |             |             |            |
| ATP-gated P2X7 channel plus competitive antagonist, chicken, 5xw6             |             |     |             |     |                                                        |             |             |            |
| -8.4                                                                          | Chl         | OH  | Ser326 [B2] | OG  | Thr322 [B2]                                            | Ser326 [B2] |             |            |
| -6.6                                                                          | Chl         | OH  | Tyr330 [C2] | OH  | Tyr330 [C2]                                            |             |             |            |
| -6.5                                                                          | Chl         | OH  | Thr327 [C2] | OG1 | Thr327 [C2]                                            | Ile328 [C2] |             |            |
|                                                                               | Thr327 [C2] | OG1 | Chl         | OH  |                                                        |             |             |            |
| Acid-sensing ion-channel (ASIC), chicken, 4nyk                                |             |     |             |     |                                                        |             |             |            |
| None                                                                          |             |     |             |     |                                                        |             |             |            |
| <b>Chloride channels</b>                                                      |             |     |             |     |                                                        |             |             |            |
| Bestrophin-1 (BEST1) Ca-activated Cl channel, jungle fowl, 4rdq               |             |     |             |     |                                                        |             |             |            |
| -9.5                                                                          | Chl         | OH  | Ala73 [A2]  | O   | Asn70 [A2]                                             | Ser71 [A2]  | Ala73 [A2]  | Glu74 [A2] |
| Bestrophin-1 (BEST1) Ca-activated Cl channel mutant, jungle fowl, 5t5n        |             |     |             |     |                                                        |             |             |            |
| -8.9                                                                          | Chl         | OH  | Ala73 [A2]  | O   | Asn70 [A2]                                             | Ala73 [A2]  | Arg255 [A3] |            |
| <b>Neurotransmitter-gated ion channels of the Cys-loop receptor family</b>    |             |     |             |     |                                                        |             |             |            |
| Glycine receptor complex with strychnine, human, 5cfb                         |             |     |             |     |                                                        |             |             |            |
| -7.2                                                                          | Chl         | OH  | Ser296 [A3] | OG  | Leu292 [A3]                                            | Ser296 [A3] |             |            |
| Glycine receptor complex with AM-3607, human, 5tio                            |             |     |             |     |                                                        |             |             |            |
| -7.5                                                                          | Chl         | OH  | Ser296 [A3] | OG  | Leu292 [A3]                                            | Ser296 [A3] |             |            |
| Glycine receptor, mutant, complex with AM-3607, human, 5tin                   |             |     |             |     |                                                        |             |             |            |
| -8.3                                                                          | Chl         | OH  | Ser296 [A3] | OG  | Leu292 [A3]                                            | Phe293 [A3] | Ser296 [A3] |            |
| Glycine receptor, complex with Gly and ivermectin, human, 5vdh                |             |     |             |     |                                                        |             |             |            |
| -8.0                                                                          | Chl         | OH  | Ser296 [A3] | OG  | Leu292 [A3]                                            | Phe293 [A3] | Ser296 [A3] |            |
| GABA-A receptor (β3 homopentamer), human, 4cof                                |             |     |             |     |                                                        |             |             |            |
| -7.5                                                                          | Chl         | OH  | Ser436 [A4] | OG  | Pro432 [A4]                                            | Phe435 [A4] | Ser436 [A4] |            |
| GABA-A receptor (α5 TMD - β3 ECD chimera) with pregnanolone, human, 5o8f      |             |     |             |     |                                                        |             |             |            |
| -8.1                                                                          | Chl         | OH  | Ser302 [A3] | OG  | Ala298 [A3]                                            | Ser302 [A3] |             |            |
|                                                                               | Ser302 [A3] | OG  | Chl         | OH  |                                                        |             |             |            |
| -7.5                                                                          | Chl         | OH  | Thr408 [A4] | OG1 | Leu405 [A4]                                            | Thr408 [A4] | Phe409 [A4] |            |



| E <sup>1</sup>                        | Donor |    | Acceptor    |     | Local Residues (within 3 Å of a cholesterol –OH group) |             |             |  |
|---------------------------------------|-------|----|-------------|-----|--------------------------------------------------------|-------------|-------------|--|
| Serotonin 5-HT3 receptor, mouse, 4pir |       |    |             |     |                                                        |             |             |  |
| -7.6                                  | Chl   | OH | Thr445 [A4] | OG1 | Ala441 [A4]                                            | Tyr442 [A4] | Thr445 [A4] |  |

**Porins etc.**

|                                                      |             |     |             |     |             |             |  |  |
|------------------------------------------------------|-------------|-----|-------------|-----|-------------|-------------|--|--|
| AQPO aquaporin lens, cow, 1ymg                       |             |     |             |     |             |             |  |  |
| None                                                 |             |     |             |     |             |             |  |  |
| AQPO aquaporin lens, sheep, 1sor                     |             |     |             |     |             |             |  |  |
| None                                                 |             |     |             |     |             |             |  |  |
| AQPO aquaporinn lens, sheep, 2b6o                    |             |     |             |     |             |             |  |  |
| None                                                 |             |     |             |     |             |             |  |  |
| AQPO aquaporin lens, sheep, 2b6p                     |             |     |             |     |             |             |  |  |
| None                                                 |             |     |             |     |             |             |  |  |
| AQPO aquaporin lens, sheep, 3m9i                     |             |     |             |     |             |             |  |  |
| None                                                 |             |     |             |     |             |             |  |  |
| AQP1 aquaporin red blood cell, human, 4csk           |             |     |             |     |             |             |  |  |
| None                                                 |             |     |             |     |             |             |  |  |
| AQP1 aquaporin red blood cell, cow, 1j4n             |             |     |             |     |             |             |  |  |
| None                                                 |             |     |             |     |             |             |  |  |
| AQP2 aquaporin, kidney, human, 4nef                  |             |     |             |     |             |             |  |  |
| None                                                 |             |     |             |     |             |             |  |  |
| AQP4 aquaporin glial cell, rat, 2d57                 |             |     |             |     |             |             |  |  |
| -5.8                                                 | Chl         | OH  | Thr120 [A3] | OG1 | Thr120 [A3] |             |  |  |
| AQP4 aquaporin glial cell, mutant, rat, 2zz9         |             |     |             |     |             |             |  |  |
| -5.7                                                 | Chl         | OH  | Thr120 [A3] | OG1 | Thr120 [A3] |             |  |  |
| AQP4 aquaporin, human, 3gd8                          |             |     |             |     |             |             |  |  |
| None                                                 |             |     |             |     |             |             |  |  |
| AQP5 aquaporin, human, 3d9s                          |             |     |             |     |             |             |  |  |
| None                                                 |             |     |             |     |             |             |  |  |
| SoPIP2 plant aquaporin, spinach, mutant, 3cll        |             |     |             |     |             |             |  |  |
| None                                                 |             |     |             |     |             |             |  |  |
| SoPIP2 plant aquaporin, spinach, mutant, 3cn5        |             |     |             |     |             |             |  |  |
| None                                                 |             |     |             |     |             |             |  |  |
| SoPIP2 plant aquaporin, spinach, mutant, 3cn6        |             |     |             |     |             |             |  |  |
| None                                                 |             |     |             |     |             |             |  |  |
| TIP2, ammonia-permeable aquaporin, Arabidopsis, 5i32 |             |     |             |     |             |             |  |  |
| None                                                 |             |     |             |     |             |             |  |  |
| <b>Urea Transporters</b>                             |             |     |             |     |             |             |  |  |
| UT-B, cow, 4ezc                                      |             |     |             |     |             |             |  |  |
| -7.6                                                 | Chl         | OH  | Ala147 [A3] | O   | Ala147 [A3] | Thr151 [A3] |  |  |
|                                                      | Chl         | OH  | Thr151 [A3] | OG1 |             |             |  |  |
|                                                      | Thr151 [A3] | OG1 | Chl         | OH  |             |             |  |  |
| UT-B bound to selenourea, cow, 4ezd                  |             |     |             |     |             |             |  |  |
| -7.0                                                 | Chl         | OH  | Thr151 [A3] | OG1 | Ala147 [A3] | Thr151 [A3] |  |  |

| E <sup>1</sup>                                     | Donor | Acceptor | Local Residues (within 3 Å of a cholesterol –OH group) |
|----------------------------------------------------|-------|----------|--------------------------------------------------------|
| <b>Rh ammonia channel</b>                          |       |          |                                                        |
| Rh C glycoprotein ammonia transporter, human, 3hd6 |       |          |                                                        |
| None                                               |       |          |                                                        |

1. kcal mol<sup>-1</sup>, with molar concentration units.

**TABLE S3 Transporters** [With subunits as given in the PDB file, and TM helix number]

| E <sup>1</sup>                                       | Donor       |     | Acceptor   |     | Local Residues (within 3 Å of a cholesterol –OH group) |             |            |            |
|------------------------------------------------------|-------------|-----|------------|-----|--------------------------------------------------------|-------------|------------|------------|
| ATPases                                              |             |     |            |     |                                                        |             |            |            |
| Calcium ATPase [B sarcolipin; C phospholamban]       |             |     |            |     |                                                        |             |            |            |
| E1 with bound Ca and AMPPCP, rabbit 1vfp             |             |     |            |     |                                                        |             |            |            |
| -6.1                                                 | Chl         | OH  | Ser942 [9] | OG  | Cys938 [9]                                             | Met941 [9]  | Ser942 [9] |            |
| -5.9                                                 | Chl         | OH  | Leu797 [6] | O   | Leu797 [6]                                             | Leu802 [6]  | Ser940 [9] |            |
| E1 with bound Ca, rabbit 1su4                        |             |     |            |     |                                                        |             |            |            |
| -6.4                                                 | Chl         | OH  | Ser942 [9] | OG  | Cys938 [9]                                             | Ser942 [9]  |            |            |
| -6.2                                                 | Chl         | OH  | Met909 [8] | O   | Thr906 [8]                                             | Met909 [8]  | Cys910 [8] |            |
| -5.8                                                 | Gly979 [10] | N   | Chl        | O   | Leu975 [10]                                            | Gly979 [10] |            |            |
| E1 with bound Ca, rabbit, 2c9m                       |             |     |            |     |                                                        |             |            |            |
| -7.0                                                 | Chl         | OH  | Thr906 [8] | OG1 | Thr906 [8]                                             | Cys910 [8]  |            |            |
|                                                      | Thr906 [8]  | OG1 | Chl        | OH  |                                                        |             |            |            |
| -6.1                                                 | Chl         | OH  | Gly842 [7] | O   | Gly842 [7]                                             |             |            |            |
| Structure in ultrathin crystals, rabbit, 3j7t        |             |     |            |     |                                                        |             |            |            |
| -6.4                                                 | Chl         | OH  | Ser942 [9] | OG  | Cys938 [9]                                             | Ser942 [9]  |            |            |
| E1 Mg bound state with TNPAMP, rabbit, 3w5b          |             |     |            |     |                                                        |             |            |            |
| -6.3                                                 | Chl         | OH  | Ser942 [9] | OG  | Cys938 [9]                                             | Ser942 [9]  |            |            |
| Ca bound phosphorylated form with AMPPN, rabbit 3ba6 |             |     |            |     |                                                        |             |            |            |
| -7.0                                                 | Chl         | OH  | Leu797 [6] | O   | Leu797 [6]                                             | Val798 [6]  | Ser940 [9] |            |
| -6.4                                                 | Chl         | OH  | Ala839 [7] | O   | Met838 [7]                                             | Ala839 [7]  | Gly842 [7] | Tyr843 [7] |
| -6.4                                                 | Chl         | OH  | Ser942 [9] | OG  | Cys938 [9]                                             | Ser942 [9]  |            |            |
| -6.3                                                 | Chl         | OH  | Met909 [8] | O   | Thr906 [8]                                             | Met909 [8]  | Cys910 [8] |            |
|                                                      | Chl         | OH  | Thr906 [8] | O   |                                                        |             |            |            |
| E1 with bound Ca and AMPPCP, rabbit 1t5s             |             |     |            |     |                                                        |             |            |            |
| -6.9                                                 | Chl         | OH  | Met909 [8] | O   | Thr906 [8]                                             | Met909 [8]  | Cys910 [8] |            |
|                                                      | Chl         | OH  | Thr906 [8] | O   |                                                        |             |            |            |
| E1 state with bound Ca and AMPPCP, rabbit, 4xou      |             |     |            |     |                                                        |             |            |            |
| -7.3                                                 | Chl         | OH  | Leu797 [6] | O   | Leu797 [6]                                             | Val798 [6]  | Ser940 [9] |            |
| -6.9                                                 | Chl         | OH  | Ser940 [9] | OG  | Leu797 [6]                                             | Val798 [6]  | Ser940 [9] |            |
| -6.4                                                 | Chl         | OH  | Ala839 [7] | O   | Met838 [7]                                             | Ala839 [7]  | Gly842 [7] | Tyr843 [7] |
|                                                      | Tyr843 [7]  | N   | Chl        | OH  |                                                        |             |            |            |
| E1 Ca bound state mutant with AMPPCP, rabbit, 4nab   |             |     |            |     |                                                        |             |            |            |
| None                                                 |             |     |            |     |                                                        |             |            |            |
| E2 State with phosphate, rabbit, 3w5d                |             |     |            |     |                                                        |             |            |            |
| -6.7                                                 | Chl         | OH  | Ser942 [9] | OG  | Cys938 [9]                                             | Met941 [9]  | Ser942 [9] |            |
| E2 state, and thapsigargin, rabbit 1iwo              |             |     |            |     |                                                        |             |            |            |
| -6.7                                                 | Chl         | OH  | Tyr295 [4] | O   | Tyr295 [4]                                             |             |            |            |
| E2 thapsigargin complex, rabbit, 5xab                |             |     |            |     |                                                        |             |            |            |
| -6.3                                                 | Chl         | OH  | Ser942 [9] | OG  | Cys938 [9]                                             | Ser942 [9]  |            |            |
| -6.2                                                 | Chl         | OH  | Tyr295 [4] | O   | Tyr295 [4]                                             |             |            |            |
| E2 state, Ca free with thapsigargin, rabbit, 2c8l    |             |     |            |     |                                                        |             |            |            |
| -6.6                                                 | Cys910 [8]  | SG  | Chl        | OH  | Thr906 [8]                                             | Cys910 [8]  |            |            |
| -6.2                                                 | Chl         | OH  | Tyr295 [4] | O   | Tyr295 [4]                                             |             |            |            |

| E <sup>1</sup>                                                    | Donor      |    | Acceptor    |    | Local Residues (within 3 Å of a cholesterol –OH group) |             |             |  |
|-------------------------------------------------------------------|------------|----|-------------|----|--------------------------------------------------------|-------------|-------------|--|
| With bound thapsigargin, rabbit, 2ear                             |            |    |             |    |                                                        |             |             |  |
| -7.2                                                              | Chl        | OH | Cys268 [3]  | O  | Cys268 [3]                                             | Trp272 [3]  |             |  |
|                                                                   | Trp272 [3] | N  | Chl         | OH |                                                        |             |             |  |
| -6.3                                                              | Trp794 [6] | N  | Chl         | OH | Val790 [6]                                             | Trp794 [6]  |             |  |
| E2 state and magnesium fluoride rabbit 1wpg                       |            |    |             |    |                                                        |             |             |  |
| 5.7                                                               | Trp794 [6] | N  | Chl         | O  | Val790 [6]                                             | Leu793 [6]  | Trp794 [6]  |  |
| E2 state and thapsigargin and aluminium fluoride rabbit 1xp5      |            |    |             |    |                                                        |             |             |  |
| -6.0                                                              | Chl        | OH | Tyr295 [4]  | O  | Tyr295 [4]                                             |             |             |  |
| E2 state, Ca free with thapsigargin and AMPPCP, rabbit, 2c8k      |            |    |             |    |                                                        |             |             |  |
| -6.3                                                              | Cys910 [8] | SG | Chl         | OH | Thr906 [8]                                             | Cys910 [8]  |             |  |
| E2 state and AMPPN and aluminium fluoride rabbit 3b9r             |            |    |             |    |                                                        |             |             |  |
| -6.5                                                              | Chl        | OH | Pro91 [2]   | O  | Ala69 [1]                                              | Pro91 [2]   | Leu95 [2]   |  |
| E2-Pi state and beryllium fluoride rabbit 3b9b                    |            |    |             |    |                                                        |             |             |  |
| None                                                              |            |    |             |    |                                                        |             |             |  |
| With bound BHQ and thapsigargin, rabbit 2agv                      |            |    |             |    |                                                        |             |             |  |
| None                                                              |            |    |             |    |                                                        |             |             |  |
| With bound thapsigargin derivative, rabbit 2by4                   |            |    |             |    |                                                        |             |             |  |
| -7.4                                                              | Chl        | OH | Val790 [6]  | O  | Val790 [6]                                             | Leu793 [6]  | Trp794 [6]  |  |
| -6.4                                                              | Chl        | OH | Leu975 [10] | O  | Leu975 [10]                                            | Pro976 [10] | Gly979 [10] |  |
| E2 Ca free state with dibutanoyl thapsigargin, 2yfy               |            |    |             |    |                                                        |             |             |  |
| -6.7                                                              | Chl        | OH | Ser942 [9]  | OG | Cys938 [9]                                             | Met941 [9]  | Ser942 [9]  |  |
| With bound thapsigargin and AMPPCP, rabbit 2c88                   |            |    |             |    |                                                        |             |             |  |
| -6.6                                                              | Chl        | OH | Tyr295 [4]  | O  | Tyr295 [4]                                             | Ala299 [4]  |             |  |
| -6.3                                                              | Chl        | OH | Gly842 [7]  | O  | Ala839 [7]                                             | Gly842 [7]  | Tyr843 [7]  |  |
| -6.2                                                              | Cys910 [8] | SG | Chl         | O  | Thr906 [8]                                             | Met909 [8]  | Cys910 [8]  |  |
| With bound CPA and thapsigargin, rabbit, 2eat                     |            |    |             |    |                                                        |             |             |  |
| -6.2                                                              | Chl        | OH | Pro91 [2]   | O  | Ala69 [1]                                              | Pro91 [2]   |             |  |
| -6                                                                | Chl        | OH | Leu266 [3]  | O  | Leu266 [3]                                             | Ile267 [3]  |             |  |
| -5.7                                                              | Chl        | OH | Leu793 [6]  | O  | Leu793 [6]                                             | Trp794 [6]  |             |  |
| With bound CPA and curcumin, rabbit, 2eau                         |            |    |             |    |                                                        |             |             |  |
| None                                                              |            |    |             |    |                                                        |             |             |  |
| With bound cyclopiazonic acid and aluminium fluoride, rabbit 2o9j |            |    |             |    |                                                        |             |             |  |
| -6.8                                                              | Chl        | OH | Val790 [6]  | O  | Val790 [6]                                             | Leu793 [6]  | Trp794 [6]  |  |
| -5.9                                                              | Cys910 [8] | SG | Chl         | O  | Thr906 [8]                                             | Cys910 [8]  |             |  |
| -5.6                                                              | Chl        | OH | Ala270 [3]  | O  | Ala270 [3]                                             | Leu273 [3]  |             |  |
|                                                                   | Chl        | OH | Leu273 [3]  | O  |                                                        |             |             |  |
| With bound cyclopiazonic acid and ADP, rabbit, 2oao               |            |    |             |    |                                                        |             |             |  |
| -7.2                                                              | Chl        | OH | Val790 [6]  | O  | Val790 [6]                                             | Trp794 [6]  |             |  |
| -5.9                                                              | Chl        | OH | Gly842 [7]  | O  | Ala839 [7]                                             | Gly842 [7]  | Tyr843 [7]  |  |
| E2-vandate complex with thapsigargin and TNP-AMPPCP, rabbit, 5a3q |            |    |             |    |                                                        |             |             |  |
| -6.1                                                              | Chl        | OH | Cys268 [3]  | O  | Cys268 [3]                                             | Trp272 [3]  |             |  |
|                                                                   | Trp272 [3] | N  | Chl         | OH |                                                        |             |             |  |

| E <sup>1</sup>                                                          | Donor       |    | Acceptor    |     | Local Residues (within 3 Å of a cholesterol –OH group) |             |             |             |
|-------------------------------------------------------------------------|-------------|----|-------------|-----|--------------------------------------------------------|-------------|-------------|-------------|
| E2-vanadate complex with thapsigargin and TNP-ATPP, rabbit, 5a3s        |             |    |             |     |                                                        |             |             |             |
| -5.9                                                                    | Chl         | OH | Tyr295 [4]  | O   | Tyr295 [4]                                             |             |             |             |
| -5.7                                                                    | Cys70 [1]   | N  | Chl         | OH  | Leu66 [1]                                              | Cys70 [1]   |             |             |
| -5.7                                                                    | Chl         | OH | Cys268 [3]  | O   | Cys268 [3]                                             | Trp272 [3]  |             |             |
| E2-BeF3 complex with TNP-AMPPCP, rabbit, 5a3r                           |             |    |             |     |                                                        |             |             |             |
| -6.6                                                                    | Chl         | OH | Ile264 [3]  | O   | Ile264 [3]                                             | Ser265 [3]  |             |             |
|                                                                         | Chl         | OH | Ser265 [3]  | OG  |                                                        |             |             |             |
| -6.0                                                                    | Chl         | OH | Ala306 [4]  | O   | Ala306 [4]                                             |             |             |             |
| -5.9                                                                    | Chl         | OH | Ala69 [1]   | O   | Ala69 [1]                                              | Pro91 [2]   |             |             |
| E1-Ca bound with lipid, rabbit, 5xa7                                    |             |    |             |     |                                                        |             |             |             |
| -6.4                                                                    | Chl         | OH | Ser942 [9]  | OG  | Cys938 [9]                                             | Ser942 [9]  |             |             |
| -6.1                                                                    | Chl         | OH | Met909 [8]  | O   | Met909 [8]                                             | Leu913 [8]  |             |             |
| -6.0                                                                    | Gly979 [10] | N  | Chl         | OH  | Leu975 [10]                                            | Pro976 [10] | Gly979 [10] |             |
| E1-ALF4 complex with Ca and ADP, rabbit, 5xa8                           |             |    |             |     |                                                        |             |             |             |
| -6.4                                                                    | Chl         | OH | Leu797 [6]  | O   | Leu797 [6]                                             | Val798 [6]  | Ser940 [9]  |             |
|                                                                         | Chl         | OH | Ser940 [9]  | OG  |                                                        |             |             |             |
| E2-ALF4 complex with thapsigargin, , rabbit, 5xa9                       |             |    |             |     |                                                        |             |             |             |
| -6.9                                                                    | Chl         | OH | Val790 [6]  | O   | Val790 [6]                                             | Trp794 [6]  |             |             |
|                                                                         | Trp794 [6]  | N  | Chl         | OH  |                                                        |             |             |             |
| E2-ALF4 complex with thapsigargin, different crystal form, rabbit, 5xaa |             |    |             |     |                                                        |             |             |             |
| -6.7                                                                    | Chl         | OH | Cys268 [3]  | O   | Cys268 [3]                                             | Tyr295 [4]  |             |             |
|                                                                         | Chl         | OH | Tyr295 [4]  | OH  |                                                        |             |             |             |
| -6.4                                                                    | Chl         | OH | Val790 [6]  | O   | Val790 [6]                                             | Leu793 [6]  | Trp794 [6]  |             |
| -6.1                                                                    | Chl         | OH | Pro91 [2]   | O   | Ala69 [1]                                              | Pro91 [2]   | Ile94 [2]   |             |
| -5.9                                                                    | Chl         | OH | Pro976 [10] | O   | Leu975 [10]                                            | Pro976 [10] | Ile978 [10] | Gly979 [10] |
|                                                                         | Gly979 [10] | N  | Chl         | OH  |                                                        |             |             |             |
| With bound tetrahydrocarbazole and TNP-ATP, rabbit, 5ncq                |             |    |             |     |                                                        |             |             |             |
| None                                                                    |             |    |             |     |                                                        |             |             |             |
| E1 with bound Ca and sarcolipin, rabbit 4h1w                            |             |    |             |     |                                                        |             |             |             |
| -6.9                                                                    | Chl         | OH | Thr18 [B]   | OG1 | Val14 [B]                                              | Thr18 [B]   |             |             |
| -6.2                                                                    | Chl         | OH | Thr18 [B]   | OG1 | Leu96 [2]                                              | Ala100 [2]  | Thr18 [B]   |             |
| -6.2                                                                    | Chl         | OH | Cys268 [3]  | O   | Cys268 [3]                                             | Val269 [3]  |             |             |
| With sarcolipin and magnesium in E1 state, rabbit 3w5a                  |             |    |             |     |                                                        |             |             |             |
| -6.1                                                                    | Chl         | OH | Cys268 [3]  | O   | Cys268 [3]                                             | Val269 [3]  |             |             |
| -6.0                                                                    | Gly979 [10] | N  | Chl         | O   | Leu975 [10]                                            | Gly979 [10] |             |             |
| With two bound phospholamban, rabbit 4kyt                               |             |    |             |     |                                                        |             |             |             |
| 7.0                                                                     | Chl         | OH | Ile33 [C]   | O   | Ile33 [C]                                              | Asn34 [C]   |             |             |
| -6.3                                                                    | Chl         | OH | Ser974 [10] | OG  | Thr906 [8]                                             | Cys910 [8]  | Ser974 [10] |             |
|                                                                         | Cys910 [8]  | SG | Chl         | O   |                                                        |             |             |             |
| SERCA pig heart, 5mpm                                                   |             |    |             |     |                                                        |             |             |             |
| None                                                                    |             |    |             |     |                                                        |             |             |             |

| E <sup>1</sup>                                                   | Donor        |     | Acceptor      |     | Local Residues (within 3 Å of a cholesterol –OH group) |               |               |               |
|------------------------------------------------------------------|--------------|-----|---------------|-----|--------------------------------------------------------|---------------|---------------|---------------|
| Na,K- ATPase [A, alpha subunit; B, β1 subunit; G, γ subunit]     |              |     |               |     |                                                        |               |               |               |
| Pig kidney, 3b8e                                                 |              |     |               |     |                                                        |               |               |               |
| -7.0                                                             | Chl          | OH  | Leu46 [B]     | O   | Tyr43 [B]                                              | Leu46 [B]     | Ala47 [B]     |               |
| -6.6                                                             | Chl          | OH  | Ser298 [A 3]  | OG  | Phe294 [A 3]                                           | Ser298 [A 3]  |               |               |
| -6.5                                                             | Chl          | OH  | Gly806 [A 6]  | O   | Gly806 [A 6]                                           | Thr807 [A 6]  | Val810 [A 6]  |               |
| -6.4                                                             | Chl          | OH  | Leu36 [G]     | O   | Leu36 [G]                                              |               |               |               |
| -6.4                                                             | Chl          | OH  | Glu953 [A 9]  | OE2 | Glu953 [A 9]                                           |               |               |               |
| -6.3                                                             | Chl          | OH  | Ala101 [A 1]  | O   | Trp98 [A 1]                                            | Ala101 [A 1]  | Ile102 [A 1]  |               |
| Pig kidney with bound Na, pre-E1P state without oligomycin, 3wgu |              |     |               |     |                                                        |               |               |               |
| -8.0                                                             | Chl          | OH  | Ser988 [A 10] | OG  | Ala925 [A 8]                                           | Ser988 [A 10] | Leu989 [A 10] |               |
| -7.2                                                             | Chl          | OH  | Glu953 [A 9]  | OE1 | Glu953 [A 9]                                           | Leu957 [A 9]  |               |               |
| -7.1                                                             | Chl          | OH  | Gly806 [A 6]  | O   | Leu805 [A 6]                                           | Gly806 [A 6]  | Met809 [A 6]  | Val810 [A 6]  |
|                                                                  | Chl          | OH  | Leu805 [A 6]  | O   |                                                        |               |               |               |
| Pig kidney with bound Na, pre-E1P state with oligomycin, 3wgv    |              |     |               |     |                                                        |               |               |               |
| -6.8                                                             | Chl          | OH  | Gly806 [A 6]  | O   | Gly806 [A 6]                                           | Glu954 [A 9]  |               |               |
| -6.7                                                             | Chl          | OH  | Gly806 [A 6]  | O   | Leu805 [A 6]                                           | Gly806 [A 6]  | Val810 [A 6]  |               |
|                                                                  | Chl          | OH  | Leu805 [A 6]  | O   |                                                        |               |               |               |
| -6.5                                                             | Chl          | OH  | Glu953 [A 9]  | OE1 | Glu953 [A 9]                                           |               |               |               |
| Pig kidney with bound Rb (K analogue), 3kdp                      |              |     |               |     |                                                        |               |               |               |
| -7.1                                                             | Chl          | OH  | Leu36 [G]     | O   | Phe33 [G]                                              | Leu36 [G]     |               |               |
|                                                                  | Chl          | OH  | Phe33 [G]     | O   |                                                        |               |               |               |
| -6.9                                                             | Thr955 [A 9] | OG1 | Chl           | O   | Trp924 [A 8]                                           | Thr955 [A 9]  |               |               |
| -6.8                                                             | Thr955 [A 9] | OG1 | Chl           | O   | Leu951 [A 9]                                           | Phe952 [A 9]  | Thr955 [A 9]  |               |
| -6.6                                                             | Chl          | OH  | Gly806 [A 6]  | O   | Leu805 [A 6]                                           | Gly806 [A 6]  |               |               |
|                                                                  | Chl          | OH  | Leu805 [A 6]  | O   |                                                        |               |               |               |
| -6.4                                                             | Ala925 [A 8] | N   | Chl           | O   | Val921 [A 8]                                           | Trp924 [A 8]  | Ala925 [A 8]  | Ser988 [A 10] |
|                                                                  | Chl          | OH  | Ser988 [A 10] | OG  |                                                        |               |               |               |
| -6.3                                                             | Chl          | OH  | Glu953 [A 9]  | OE2 | Gly806 [A 6]                                           | Glu953 [A 9]  |               |               |
|                                                                  | Chl          | OH  | Gly806 [A 6]  | O   |                                                        |               |               |               |
| Pig kidney phosphorylated form with bufalin, 4res                |              |     |               |     |                                                        |               |               |               |
| -7.9                                                             | Thr955 [A 9] | OG1 | Chl           | O   | Trp924 [A 8]                                           | Leu951 [A 9]  | Thr955 [A 9]  |               |
| -7.4                                                             | Chl          | OH  | Gly848 [A 7]  | O   | Tyr847 [A 7]                                           | Gly848 [A 7]  | Tyr43 [B]     |               |
|                                                                  | Chl          | OH  | Tyr847 [A 7]  | O   |                                                        |               |               |               |
|                                                                  | Tyr43 [B]    | OH  | Chl           | O   |                                                        |               |               |               |
| Pig kidney phosphorylated form with ouabain, 4hyt                |              |     |               |     |                                                        |               |               |               |
| -6.6                                                             | Ala925 [A 8] | N   | Chl           | O   | Val921 [A 8]                                           | Trp924 [A 8]  | Ala925 [A 8]  |               |
| -6.5                                                             | Chl          | OH  | Gly848 [A 7]  | O   | Tyr847 [A 7]                                           | Gly848 [A 7]  | Tyr43 [B]     |               |
|                                                                  | Chl          | OH  | Tyr43 [B]     | OH  |                                                        |               |               |               |
|                                                                  | Chl          | OH  | Tyr847 [A 7]  | O   |                                                        |               |               |               |
|                                                                  | Tyr43 [B]    | OH  | Chl           | O   |                                                        |               |               |               |

| E <sup>1</sup>                   | Donor        |    | Acceptor      |     | Local Residues (within 3 Å of a cholesterol –OH group) |               |               |                             |
|----------------------------------|--------------|----|---------------|-----|--------------------------------------------------------|---------------|---------------|-----------------------------|
| Shark, 2zxe                      |              |    |               |     |                                                        |               |               |                             |
| -8.1                             | Chl          | OH | Thr814 [A 6]  | O   | Gly813 [A 6]                                           | Thr814 [A 6]  | Met816 [A 6]  | Val817 [A 6]<br>Pro818 [A6] |
| -6.9                             | Chl          | OH | Ser995 [A 10] | OG  | Ser995 [A 10]                                          | Leu996 [A 10] |               |                             |
| -6.6                             | Chl          | OH | Glu960 [A 9]  | OE1 | Glu960 [A 9]                                           |               |               |                             |
| -6.3                             | Chl          | OH | Thr138 [A 2]  | OG1 | Val134 [A 2]                                           | Ser137 [A 2]  | Thr138 [A 2]  |                             |
| Shark complex with ouabain, 3a3y |              |    |               |     |                                                        |               |               |                             |
| -7.6                             | Chl          | OH | Ser995 [A 10] | OG  | Ser995 [A 10]                                          | Leu996 [A 10] |               |                             |
| -7.1                             | Chl          | OH | Leu41 [B]     | O   | Tyr40 [B]                                              | Leu41 [B]     | Gly45 [B]     |                             |
| -7.1                             | Chl          | OH | Ile327 [A 4]  | O   | Ala299 [A 3]                                           | Ile327 [A 4]  |               |                             |
| -6.9                             | Ala932 [A 8] | N  | Chl           | O   | Val928 [A 8]                                           | Trp931 [A 8]  | Ala932 [A 8]  | Ser995 [A 10]               |
| Shark with Tl substitution, 5avr |              |    |               |     |                                                        |               |               |                             |
| -8.1                             | Chl          | OH | Ser995 [A 10] | OG  | Ser995 [A 10]                                          | Leu996 [A 10] |               |                             |
| Shark with Rb substitution, 5aw4 |              |    |               |     |                                                        |               |               |                             |
| -7.6                             | Chl          | OH | Ser995 [A 10] | OG  | Ser995 [A 10]                                          | Leu996 [A 10] |               |                             |
| -6.8                             | Chl          | OH | Ser995 [A 10] | OG  | Ala932 [A 8]                                           | Ser995 [A 10] | Leu996 [A 10] |                             |

## Solute Carrier (SLC) Transporter Superfamily

|                                                                                                   |     |    |             |     |             |             |             |            |
|---------------------------------------------------------------------------------------------------|-----|----|-------------|-----|-------------|-------------|-------------|------------|
| EAAT1 excitatory amino acid transporter (SLC1), mutant, bound to L-Asp, human, 5llu               |     |    |             |     |             |             |             |            |
| -5.9                                                                                              | Chl | OH | Trp267 [5]  | O   | Trp267 [5]  | Tyr268 [5]  | Pro270 [5]  | Leu271 [5] |
| GLUT1 glucose transporter (SLC2), mutant, human, 4pyp                                             |     |    |             |     |             |             |             |            |
| None                                                                                              |     |    |             |     |             |             |             |            |
| GLUT1 glucose transporter (SLC2), bound to cytocholasin, human, 5eqi                              |     |    |             |     |             |             |             |            |
| -7.1                                                                                              | Chl | OH | Ser73 [2]   | OG  | Ser73 [2]   | Trp412 [11] |             |            |
| GLUT1 glucose transporter (SLC2), bound to GLUT-i1 inhibitor, human, 5eqg                         |     |    |             |     |             |             |             |            |
| -6.6                                                                                              | Chl | OH | Ser73 [2]   | OG  | Ser73 [2]   | Trp412 [11] |             |            |
| GLUT1 glucose transporter (SLC2), bound to GLUT-i2 inhibitor, human, 5eqh                         |     |    |             |     |             |             |             |            |
| -6.6                                                                                              | Chl | OH | Ser73 [2]   | OG  | Ser73 [2]   | Trp412 [11] |             |            |
| GLUT3 glucose transporter (SLC2), mutant, bound to D-glucose, outward facing form, human, 4zw9    |     |    |             |     |             |             |             |            |
| -6.0                                                                                              | Chl | OH | Thr103 [3]  | OG1 | Leu99 [3]   | Val102 [3]  | Thr103 [3]  |            |
| -5.8                                                                                              | Chl | OH | Thr441 [12] | OG1 | Gly437 [12] | Ile440 [12] | Thr441 [12] |            |
| GLUT3 glucose transporter (SLC2), mutant, bound to maltose, outward facing form, human, 4zwb      |     |    |             |     |             |             |             |            |
| -5.9                                                                                              | Chl | OH | Thr103 [3]  | OG1 | Leu99 [3]   | Thr103 [3]  |             |            |
| -5.9                                                                                              | Chl | OH | Thr441 [12] | OG1 | Gly437 [12] | Ile440 [12] | Thr441 [12] |            |
| GLUT3 glucose transporter (SLC2), mutant, bound to D-glucose, outward facing form, human, 4zwc    |     |    |             |     |             |             |             |            |
| -5.7                                                                                              | Chl | OH | Thr103 [3]  | OG1 | Leu99 [3]   | Val102 [3]  | Thr103 [3]  |            |
| -5.5                                                                                              | Chl | OH | Thr441 [12] | OG1 | Gly437 [12] | Phe438 [12] | Thr441 [12] |            |
| GLUT5 fructose transporter (SLC2), open-inward facing form, bovine, 4yb9                          |     |    |             |     |             |             |             |            |
| -7.2                                                                                              | Chl | OH | Thr452 [12] | OG1 | Ile448 [12] | Thr452 [12] |             |            |
| -7                                                                                                | Chl | OH | Ser422 [11] | OG  | Val418 [11] | Ser422 [11] |             |            |
| -6.4                                                                                              | Chl | OH | Thr354 [9]  | OG1 | Thr354 [9]  | Ala355 [9]  |             |            |
| GLUT5 fructose transporter (SLC2), open-outward facing form [renumbered to matxh 4yb9], rat, 4yba |     |    |             |     |             |             |             |            |
| -6.6                                                                                              | Chl | OH | Ser422 [11] | OG  | Val418 [11] | Ser422 [11] |             |            |

| E <sup>1</sup>                                        | Donor | Acceptor | Local Residues (within 3 Å of a cholesterol –OH group) |  |  |  |  |  |
|-------------------------------------------------------|-------|----------|--------------------------------------------------------|--|--|--|--|--|
| Erythrocyte Band 3 anion exchange (SLC4), human, 4yzf |       |          |                                                        |  |  |  |  |  |
| None                                                  |       |          |                                                        |  |  |  |  |  |

|                                                                                                |     |    |             |     |             |             |             |  |
|------------------------------------------------------------------------------------------------|-----|----|-------------|-----|-------------|-------------|-------------|--|
| DAT Dopamine transporter (SLC6), bound to antidepressant, Drosophila, 4m48                     |     |    |             |     |             |             |             |  |
| None                                                                                           |     |    |             |     |             |             |             |  |
| DAT Dopamine transporter (SLC6), bound to dopamine, Drosophila, 4xp1                           |     |    |             |     |             |             |             |  |
| -7.8                                                                                           | Chl | OH | Ser453 [9]  | OG  | Ala449 [9]  | Phe452 [9]  | Ser453 [9]  |  |
| -6.7                                                                                           | Chl | OH | Thr535 [11] | OG1 | Thr535 [11] |             |             |  |
| DAT Dopamine transporter (SLC6), bound to D-amphetamine, Drosophila, 4xp9                      |     |    |             |     |             |             |             |  |
| -8.1                                                                                           | Chl | OH | Ser412 [8]  | OG  | Ala408 [8]  | Ser412 [8]  |             |  |
| DAT Dopamine transporter (SLC6), bound to methamphetamine, Drosophila, 4xp6                    |     |    |             |     |             |             |             |  |
| -7.6                                                                                           | Chl | OH | Ser453 [9]  | OG  | Ala449 [9]  | Phe452 [9]  | Ser453 [9]  |  |
| -6.9                                                                                           | Chl | OH | Thr535 [11] | OG1 | Leu484 [10] | Thr535 [11] |             |  |
| DAT Dopamine transporter (SLC6), bound to 3,4-dichlorophenethylamine, Drosophila, 4xp4         |     |    |             |     |             |             |             |  |
| -8                                                                                             | Chl | OH | Ser453 [9]  | OG  | Ala449 [9]  | Phe452 [9]  | Ser453 [9]  |  |
| DAT Dopamine transporter (SLC6), bound to cocaine, Drosophila, 4xp4                            |     |    |             |     |             |             |             |  |
| -7.4                                                                                           | Chl | OH | Ser453 [9]  | OG  | Ala449 [9]  | Ser453 [9]  |             |  |
| DAT Dopamine transporter (SLC6), bound to cocaine analogue, Drosophila, 4xp5                   |     |    |             |     |             |             |             |  |
| -6.9                                                                                           | Chl | OH | Ser453 [9]  | OG  | Ala449 [9]  | Phe452 [9]  | Ser453 [9]  |  |
| DAT Dopamine transporter (SLC6), mutant, bound to cocaine, Drosophila, 4xpb                    |     |    |             |     |             |             |             |  |
| -6.5                                                                                           | Chl | OH | Ser566 [12] | OG  | Cys562 [12] | Ile563 [12] | Ser566 [12] |  |
| -6.4                                                                                           | Chl | OH | Ser453 [9]  | OG  | Ala449 [9]  | Phe452 [9]  | Ser453 [9]  |  |
| DAT Dopamine transporter (SLC6), mutant, bound to RTI55, Drosophila, 4xpf                      |     |    |             |     |             |             |             |  |
| -7.4                                                                                           | Chl | OH | Thr355 [7]  | OG1 | Ile351 [7]  | Ala354 [7]  | Thr355 [7]  |  |
| DAT Dopamine transporter (SLC6), mutant, bound to beta-CFT, Drosophila, 4xpg                   |     |    |             |     |             |             |             |  |
| -7.8                                                                                           | Chl | OH | Ser453 [9]  | OG  | Ala449 [9]  | Ser453 [9]  |             |  |
| DAT Dopamine transporter (SLC6), mutant, bound to 3,4-dichlorophenethylamine, Drosophila, 4xph |     |    |             |     |             |             |             |  |
| -7.7                                                                                           | Chl | OH | Ser453 [9]  | OG  | Ala449 [9]  | Ser453 [9]  |             |  |
| -6.9                                                                                           | Chl | OH | Ser482 [10] | PG  | Ser482 [10] | Ala564 [12] | Val568 [12] |  |
| DAT Dopamine transporter (SLC6), mutant with 3,4-dichlorophenethylamine, Drosophila, 4xpt      |     |    |             |     |             |             |             |  |
| -7.5                                                                                           | Chl | OH | Ser453 [9]  | OG  | Ala449 [9]  | Phe452 [9]  | Ser453 [9]  |  |
| DAT Dopamine transporter (SLC6), bound to nisoxetine, Drosophila, 4xnu                         |     |    |             |     |             |             |             |  |
| -6.9                                                                                           | Chl | OH | Ser453 [9]  | OG  | Ala449 [9]  | Ser453 [9]  |             |  |
| DAT Dopamine transporter (SLC6), bound to reboxetine, Drosophila, 4xnx                         |     |    |             |     |             |             |             |  |
| -7.5                                                                                           | Chl | OH | Ser453 [9]  | OG  | Ala449 [9]  | Ser453 [9]  |             |  |

|                                                                          |     |    |             |     |             |             |             |  |
|--------------------------------------------------------------------------|-----|----|-------------|-----|-------------|-------------|-------------|--|
| Serotonin transporter (SLC6), bound to paroxetine, human, 5i6x           |     |    |             |     |             |             |             |  |
| -8.5                                                                     | Chl | OH | Thr264 [4]  | OG1 | Met260 [4]  | Thr264 [4]  |             |  |
| -7.7                                                                     | Chl | OH | Thr503 [10] | OG1 | Pro499 [10] | Ala500 [10] | Thr503 [10] |  |
| -7.1                                                                     | Chl | OH | Thr433 [8]  | OG1 | Leu429 [8]  | Thr433 [8]  |             |  |
| -6.9                                                                     | Chl | OH | Ser584 [12] | O   | Ile167 [3]  | Tyr171 [3]  | Ser584 [12] |  |
|                                                                          | Chl | OH | Tyr171 [3]  | OH  |             |             |             |  |
| Serotonin transporter (SLC6), mutant, bound to s-citalopram, human, 5i71 |     |    |             |     |             |             |             |  |
| -9.1                                                                     | Chl | OH | Phe263 [4]  | O   | Met260 [4]  | Phe263 [4]  | Thr264 [4]  |  |
|                                                                          | Chl | OH | Thr264 [4]  | OG1 |             |             |             |  |



| E <sup>1</sup>                                                                           | Donor |    | Acceptor    |     | Local Residues (within 3 Å of a cholesterol –OH group) |             |             |  |
|------------------------------------------------------------------------------------------|-------|----|-------------|-----|--------------------------------------------------------|-------------|-------------|--|
| -7.5                                                                                     | Chl   | OH | Thr371 [7]  | OG1 | Val367 [7]                                             | Met370 [7]  | Thr371 [7]  |  |
| Serotonin transporter (SLC6), mutant, bound to s-citalopram at more sites, human, 5i73   |       |    |             |     |                                                        |             |             |  |
| -9.2                                                                                     | Chl   | OH | Phe263 [4]  | O   | Met260 [4]                                             | Phe263 [4]  | Thr264 [4]  |  |
| -8.0                                                                                     | Chl   | OH | Phe263 [4]  | O   | Met260 [4]                                             | Phe263 [4]  | Thr264 [4]  |  |
|                                                                                          | Chl   | OH | Thr264 [4]  | OG1 |                                                        |             |             |  |
| -6.3                                                                                     | Chl   | OH | Phe548 [12] | O   | Leu547 [12]                                            | Phe548 [12] |             |  |
| -6.2                                                                                     | Chl   | OH | Thr286 [5]  | OG1 | Val283 [5]                                             | Thr286 [5]  | Phe287 [5]  |  |
| Serotonin transporter (SLC6), mutant, bound to Br-citalopram, human, 5i74                |       |    |             |     |                                                        |             |             |  |
| -8.5                                                                                     | Chl   | OH | Thr264 [4]  | OG1 | Met260 [4]                                             | Phe263 [4]  | Thr264 [4]  |  |
| -6.2                                                                                     | Chl   | OH | Phe548 [12] | O   | Leu547 [12]                                            | Phe548 [12] | Phe551 [12] |  |
| Serotonin transporter (SLC6), mutant, bound to citalopram and Br-citalopram, human, 5i75 |       |    |             |     |                                                        |             |             |  |
| -9.1                                                                                     | Chl   | OH | Phe263 [4]  | O   | Met260 [4]                                             | Phe263 [4]  | Thr264 [4]  |  |
|                                                                                          | Chl   | OH | Thr264 [4]  | OG1 |                                                        |             |             |  |
| -6.5                                                                                     | Chl   | OH | Thr286 [5]  | OG1 | Val283 [5]                                             | Thr286 [5]  | Phe287 [5]  |  |
| -6.3                                                                                     | Chl   | OH | Phe548 [12] | O   | Leu547 [12]                                            | Phe548 [12] |             |  |

## Antiporters

|                                                                              |            |     |            |    |            |            |            |  |
|------------------------------------------------------------------------------|------------|-----|------------|----|------------|------------|------------|--|
| Mitochondrial ADP/ATP Carrier with carboxyatractyloside, heart, bovine, 1okc |            |     |            |    |            |            |            |  |
| -6.7                                                                         | Chl        | OH  | Ala24 [1]  | O  | Ala24 [1]  |            |            |  |
| Mitochondrial ADP/ATP Carrier, with bound cardiolipins, heart, bovine, 2c3e  |            |     |            |    |            |            |            |  |
| -7.3                                                                         | Chl        | OH  | Gly224 [5] | O  | Gly224 [5] | Ser227 [5] | Tyr228 [5] |  |
| -6.5                                                                         | Arg234 [5] | NH2 | Chl        | OH | Leu127 [3] | Ser179 [4] | Arg234 [5] |  |
|                                                                              | Chl        | OH  | Ser179 [4] | OG |            |            |            |  |
| -6.3                                                                         | Chl        | OH  | Ala24 [1]  | O  | Ala24 [1]  |            |            |  |

## ATP Binding Cassette (ABC) Transporters

|                                                                        |            |     |            |     |            |            |              |  |
|------------------------------------------------------------------------|------------|-----|------------|-----|------------|------------|--------------|--|
| P-Glycoprotein, nucleotide-free, inward-facing, mouse, 4q9h            |            |     |            |     |            |            |              |  |
| -8.7                                                                   | His60 [1]  | NE2 | Chl        | OH  | His60 [1]  | Gln191 [3] | Gln942 [11]  |  |
| -8.4                                                                   | Chl        | OH  | Tyr303 [5] | OH  | Tyr303 [5] | Gln721 [7] |              |  |
| -6.2                                                                   | Chl        | OH  | Thr765 [8] | OG1 | Cys713 [7] | Thr765 [8] |              |  |
| P-Glycoprotein, ATP-bound, outward-facing, human, 6cOv                 |            |     |            |     |            |            |              |  |
| -7.4                                                                   | Chl        | OH  | Ser222 [4] | OG  | Ser222 [4] | Gly226 [4] |              |  |
|                                                                        | Ser222 [4] | OG  | Chl        | OH  |            |            |              |  |
| -7.0                                                                   | Chl        | OH  | Thr845 [9] | OG1 | Ala841 [9] | Thr845 [9] |              |  |
| -6.5                                                                   | Chl        | OH  | Ala987 [9] | O   | Asn839 [9] | Ala987 [9] |              |  |
| MRP-1 drug resistance protein, ATP-bound, outward facing, bovine, 6bhu |            |     |            |     |            |            |              |  |
| -9.6                                                                   | Chl        | OH  | Ser446 [3] | OG  | Asp336 [1] | Ser446 [3] | Gln450 [3]   |  |
| -7.6                                                                   | Chl        | OH  | Thr378 [2] | OG1 | Ala374 [2] | Thr378 [2] | Asn1207 [11] |  |
| ABCB10 mitochondrial ABC transporter with bound AMPPC, human, 4ayt     |            |     |            |     |            |            |              |  |
| -8.7                                                                   | Chl        | OH  | Ser182 [1] | OG  | Leu178 [1] | Ser182 [1] | Arg295 [3]   |  |
| -8.7                                                                   | Chl        | OH  | Ser326 [4] | OG  | Val322 [4] | Val325 [4] | Ser326 [4]   |  |
| -8.0                                                                   | Chl        | OH  | Ser181 [1] | OG  |            |            |              |  |
|                                                                        | Ser181 [1] | OG  | Chl        | OH  | Ser181 [1] | Ser182 [1] |              |  |
| -7.9                                                                   | Chl        | OH  | Ser301 [3] | OG  | Gly297 [3] | Ser301 [3] |              |  |

| E <sup>1</sup>                                                                | Donor      |     | Acceptor     |     | Local Residues (within 3 Å of a cholesterol –OH group) |              |              |  |
|-------------------------------------------------------------------------------|------------|-----|--------------|-----|--------------------------------------------------------|--------------|--------------|--|
| ABC10 mitochondrial ABC transporter with bound AMPPC, rod form, human, 4ayx   |            |     |              |     |                                                        |              |              |  |
| -8.6                                                                          | Trp440 [6] | NE1 | Chl          | OH  | Gln299 [3]                                             | Trp440 [6]   |              |  |
| -8.6                                                                          | Chl        | OH  | Ser182 [1]   | OG  | Leu178 [1]                                             | Ser181 [1]   | Ser182 [1]   |  |
| -8.6                                                                          | Chl        | OH  | Ser182 [1]   | OG  | Ser182 [1]                                             | Gln299 [3]   |              |  |
| -8                                                                            | Chl        | OH  | Ser181 [1]   | OG  | Ser181 [1]                                             | Gly225 [2]   |              |  |
| -7.7                                                                          | Chl        | OH  | Ser326 [4]   | OG  | Val322 [4]                                             | Val325 [4]   | Ser326 [4]   |  |
| ABC10 mitochondrial ABC transporter with bound AMPPC, plate form, human, 4ayw |            |     |              |     |                                                        |              |              |  |
| -9.5                                                                          | Chl        | OH  | Ser181 [1]   | OG  | Ser181 [1]                                             | Gly225 [2]   |              |  |
| -9.5                                                                          | Chl        | OH  | Ser326 [4]   | OG  | Val322 [4]                                             | Val325 [4]   | Ser326 [4]   |  |
| -8.5                                                                          | Trp440 [6] | NE1 | Chl          | OH  | Ser185 [1]                                             | Gln299 [3]   | Trp440 [6]   |  |
| ABC10 mitochondrial ABC transporter, nucleotide-free rod form, human, 3zdg    |            |     |              |     |                                                        |              |              |  |
| -8.4                                                                          | Chl        | OH  | Ser181 [1]   | OG  | Ser181 [1]                                             | Asn229 [2]   |              |  |
|                                                                               | Ser181 [1] | OG  | Chl          | OH  |                                                        |              |              |  |
| -8.3                                                                          | Chl        | OH  | Ser182 [1]   | OG  | Ser182 [1]                                             | Gln299 [3]   |              |  |
| -8.3                                                                          | Trp440 [6] | NE1 | Chl          | OH  | Gln299 [3]                                             | Trp440 [6]   |              |  |
| Cystic Fibrosis Transmembrane conductance regulator (CFTR), Zebra fish, 5tsi  |            |     |              |     |                                                        |              |              |  |
| -9.2                                                                          | Chl        | OH  | Leu1114 [11] | O   | Leu1114 [11]                                           | Phe1115 [11] |              |  |
| -8.1                                                                          | Chl        | OH  | Ser232 [4]   | OG  | Leu228 [4]                                             | Ser232 [4]   |              |  |
| -7.7                                                                          | Chl        | OH  | Glu871 [7]   | OE1 | Glu871 [7]                                             | Tyr927 [8]   | Leu934 [8]   |  |
|                                                                               | Chl        | OH  | Tyr927 [8]   | OH  |                                                        |              |              |  |
| -7.5                                                                          | Chl        | OH  | Phe313 [5]   | O   | Ala310 [5]                                             | Phe313 [5]   | Ser314 [5]   |  |
| -6.9                                                                          | Arg941 [8] | NH1 | Chl          | OH  | Arg941 [8]                                             |              |              |  |
| -6.9                                                                          | Chl        | OH  | Thr133 [2]   | OG1 | Gly129 [2]                                             | Leu130 [2]   | Thr133 [2]   |  |
| -6.5                                                                          | Chl        | OH  | Thr1120 [11] | OG1 | Val1116 [11]                                           | Phe1117 [11] | Thr1120 [11] |  |

1. kcal mol<sup>-1</sup>, with molar concentration units.

**TABLE S4 Other Membrane Proteins**

| E <sup>1</sup>                                                                                | Donor       | Acceptor | Local Residues (within 3 Å of a cholesterol –OH group) |     |             |             |             |             |
|-----------------------------------------------------------------------------------------------|-------------|----------|--------------------------------------------------------|-----|-------------|-------------|-------------|-------------|
| <b>Novel Receptors</b>                                                                        |             |          |                                                        |     |             |             |             |             |
| STRA6 retinol uptake receptor, zebra fish, 5sy1                                               |             |          |                                                        |     |             |             |             |             |
| -7.3                                                                                          | Chl         | OH       | Ser48 [A1]                                             | OG  | Ala45 [A1]  | Ser48 [A1]  | Leu49 [A1]  |             |
| -6.4                                                                                          | Chl         | OH       | Thr133 [A3]                                            | OG1 | Leu129 [A3] | Thr133 [A3] |             |             |
| -6.0                                                                                          | Chl         | OH       | Ala191 [A5]                                            | O   | Ala191 [A5] | Cys192 [A5] |             |             |
| <b>Tetraspanins</b>                                                                           |             |          |                                                        |     |             |             |             |             |
| CD81 tetraspanin, human, 5tcx                                                                 |             |          |                                                        |     |             |             |             |             |
| None                                                                                          |             |          |                                                        |     |             |             |             |             |
| <b>Intramembrane Proteases</b>                                                                |             |          |                                                        |     |             |             |             |             |
| CAAX protease ZMPSTE24, human, 4aw6                                                           |             |          |                                                        |     |             |             |             |             |
| -11.5                                                                                         | Chl         | OH       | Ser208 [5]                                             | OG  | Thr204 [5]  | Ser208 [5]  | Gln353 [6]  |             |
| -11.5                                                                                         | Chl         | OH       | Thr204 [5]                                             | OG1 | Thr204 [5]  | Leu205 [5]  | Ser208 [5]  | Gln353 [6]  |
| -10.6                                                                                         | Chl         | OH       | Glu86. [2]                                             | OE2 | Glu86 [2]   | Thr90 [2]   |             |             |
| CAAX protease ZMPSTE24, mutant, complex with tetrapeptide, human, 2ypt                        |             |          |                                                        |     |             |             |             |             |
| -11.2                                                                                         | Chl         | OH       | Ser208 [5]                                             | OG  | Thr204 [5]  | Ser208 [5]  | Gln353 [6]  |             |
| -10.1                                                                                         | Chl         | OH       | Glu86 [2]                                              | OE2 | Glu86 [2]   | Thr90 [2]   |             |             |
| -8.8                                                                                          | Chl         | OH       | Ser134 [3]                                             | OG  | Ala130 [3]  | Thr131 [3]  | Ser134 [3]  |             |
| -8.4                                                                                          | Chl         | OH       | Ser208 [5]                                             | OG  | Thr204 [5]  | Leu205 [5]  | Ser208 [5]  | Gln353 [6]  |
|                                                                                               | Chl         | OH       | Thr204 [5]                                             | OG1 |             |             |             |             |
| γ-secretase, human, 5a63                                                                      |             |          |                                                        |     |             |             |             |             |
| -7.3                                                                                          | Chl         | OH       | Thr99 [B1]                                             | OG1 | Val95 [B1]  | Ala98 [B1]  | Thr99 [B1]  |             |
| -6.4                                                                                          | Chl         | OH       | Tyr181 [B2]                                            | OH  | Thr99 [B1]  | Tyr181 [B2] |             |             |
|                                                                                               | Tyr181 [B2] | OH       | Chl                                                    | OH  |             |             |             |             |
| <b>Membrane-associated proteins in Eicosanoid and Glutathione metabolism proteins (MAPEG)</b> |             |          |                                                        |     |             |             |             |             |
| Microsomal Glutathione transferase I, rat, 2h8a                                               |             |          |                                                        |     |             |             |             |             |
| -6.3                                                                                          | Chl         | OH       | Phe134 [B4]                                            | O   | Phe133 [B4] | Phe134 [B4] | Tyr137 [B4] | Gly138 [B4] |
| -6.2                                                                                          | Chl         | OH       | Tyr115 [C3]                                            | OH  | Tyr115 [C3] |             |             |             |
|                                                                                               | Tyr115 [C3] | OH       | Chl                                                    | OH  |             |             |             |             |
| Microsomal prostaglandin E synthase, human, 3dww                                              |             |          |                                                        |     |             |             |             |             |
| -6.7                                                                                          | His102 [A3] | ND1      | Chl                                                    | OH  | Met101 [A3] | His102 [A3] |             |             |
| -6.7                                                                                          | Chl         | OH       | Gln134 [A4]                                            | O   | Gln134 [A4] | Cys137 [A4] | Ala138 [A4] |             |
| -6.4                                                                                          | Chl         | OH       | Leu132 [A4]                                            | O   | Val105 [A3] | Gly109 [A3] | Leu132 [A4] |             |
| -6.2                                                                                          | Chl         | OH       | Ser139 [A4]                                            | OG  | Leu135 [A4] | Pro136 [A4] | Ser139 [A4] |             |
| Microsomal prostaglandin E synthase, human, 4a10                                              |             |          |                                                        |     |             |             |             |             |
| None                                                                                          |             |          |                                                        |     |             |             |             |             |
| 5-lipoxygenase-activating protein, human, 2q7m                                                |             |          |                                                        |     |             |             |             |             |
| None                                                                                          |             |          |                                                        |     |             |             |             |             |
| Leukotriene LTC-4 synthase, human, 2pno                                                       |             |          |                                                        |     |             |             |             |             |
| None                                                                                          |             |          |                                                        |     |             |             |             |             |
| Leukotriene LTC-4 synthase, human, 2uuh                                                       |             |          |                                                        |     |             |             |             |             |
| None                                                                                          |             |          |                                                        |     |             |             |             |             |

| E <sup>1</sup>                                                                | Donor | Acceptor | Local Residues (within 3 Å of a cholesterol –OH group) |  |  |  |  |  |
|-------------------------------------------------------------------------------|-------|----------|--------------------------------------------------------|--|--|--|--|--|
| LeukotrieneLTC-4 synthase with bound leukotriene analog I, human, 4jcz        |       |          |                                                        |  |  |  |  |  |
| None                                                                          |       |          |                                                        |  |  |  |  |  |
| LeukotrieneLTC-4 synthase mutant with bound leukotriene analog I, human, 4jrz |       |          |                                                        |  |  |  |  |  |
| None                                                                          |       |          |                                                        |  |  |  |  |  |
| LeukotrieneLTC-4 synthase with bound leukotriene analog II, human, 4j7t       |       |          |                                                        |  |  |  |  |  |
| None                                                                          |       |          |                                                        |  |  |  |  |  |
| LeukotrieneLTC-4 synthase with bound leukotriene analog III, human, 4j7y      |       |          |                                                        |  |  |  |  |  |
| None                                                                          |       |          |                                                        |  |  |  |  |  |

#### Sterol-Sensing Domain (SSD) Proteins

|                                      |            |    |              |     |              |              |            |  |
|--------------------------------------|------------|----|--------------|-----|--------------|--------------|------------|--|
| Niemann-Pick C1 protein, human, 5u73 |            |    |              |     |              |              |            |  |
| -6.5                                 | Chl        | OH | Thr743 [6]   | OG1 | Thr743 [6]   | Val744 [6]   |            |  |
| -6.0                                 | Ser666 [4] | OG | Chl          | OH  | Leu662 [4]   | Ile663 [4]   | Ser666 [4] |  |
| Niemann-Pick C1 protein, human, 5u74 |            |    |              |     |              |              |            |  |
| -6.6                                 | Chl        | OH | His1239 [13] | ND1 | Thr1238 [13] | His1239 [13] |            |  |
| -6.4                                 | Ser666 [4] | OG | Chl          | OH  | Leu662 [4]   | Ser666 [4]   |            |  |
| -6.2                                 | Chl        | OH | Thr743 [6]   | OG1 | Phe740 [6]   | Thr743 [6]   | Val744 [6] |  |

#### Palmitoyl Transferase

|                                    |     |    |           |     |           |           |           |  |
|------------------------------------|-----|----|-----------|-----|-----------|-----------|-----------|--|
| Palmitoyl transferase, human, 6bml |     |    |           |     |           |           |           |  |
| None                               |     |    |           |     |           |           |           |  |
| Palmitoyl transferase, human, 6bmm |     |    |           |     |           |           |           |  |
| -5.9                               | Chl | OH | Thr23 [1] | OG1 | Thr23 [1] |           |           |  |
| Palmitoyl transferase, human, 6bmn |     |    |           |     |           |           |           |  |
| -5.5                               | Chl | OH | Thr23 [1] | OG1 | Val19 [1] | Leu20 [1] | Thr23 [1] |  |

#### Fatty Acid Desaturase

|                                                                                     |     |    |            |     |            |             |             |  |
|-------------------------------------------------------------------------------------|-----|----|------------|-----|------------|-------------|-------------|--|
| Stearoyl-coenzyme A desaturase (SCD1), with substrate, human, 4zyo: ih, inner helix |     |    |            |     |            |             |             |  |
| -7.7                                                                                | Chl | OH | Tyr108 [2] | OH  | Tyr108 [2] | Leu290 [ih] | Gly291 [ih] |  |
| -7.2                                                                                | Chl | OH | Thr231 [3] | OG1 | Phe227 [3] | Thr231 [3]  | Thr250 [4]  |  |
| Stearoyl-coenzyme A desaturase (SCD1), with substrate, mouse, 4ymk                  |     |    |            |     |            |             |             |  |
| -7.2                                                                                | Chl | OH | Thr106 [2] | OG1 | Phe102 [2] | Met105 [2]  | Thr106 [2]  |  |

#### Hydrolases

|                                           |     |    |            |     |            |            |  |  |
|-------------------------------------------|-----|----|------------|-----|------------|------------|--|--|
| Estrone sulphatase, placenta, human, 1p49 |     |    |            |     |            |            |  |  |
| -5.9                                      | Chl | OH | Thr196 [1] | OG1 | Ile192 [1] | Thr196 [1] |  |  |

#### Electron Transport Chain Complex II

|                                                                                      |     |    |            |     |            |            |            |  |
|--------------------------------------------------------------------------------------|-----|----|------------|-----|------------|------------|------------|--|
| Succinate:ubiquinone oxidoreductase (SQR, Complex II), heart, chicken, 2fbw          |     |    |            |     |            |            |            |  |
| -5.7                                                                                 | Chl | OH | Ala90 [C2] | O   | Ala90 [C2] | Leu91 [C2] | Pro94 [C2] |  |
|                                                                                      | Chl | OH | Leu91 [C2] | O   |            |            |            |  |
| Succinate:ubiquinone oxidoreductase (SQR, Complex II) with TEO, heart, chicken, 2h88 |     |    |            |     |            |            |            |  |
| None                                                                                 |     |    |            |     |            |            |            |  |
| Succinate:ubiquinone oxidoreductase (SQR, Complex II), heart, pig, 1zoy              |     |    |            |     |            |            |            |  |
| -8.6                                                                                 | Chl | OH | Thr77 [D2] | OG1 | Ala74 [D2] | Thr77 [D2] | Leu78 [D2] |  |

| E <sup>1</sup>                                                       | Donor      |     | Acceptor    |     | Local Residues (within 3 Å of a cholesterol –OH group) |             |             |  |
|----------------------------------------------------------------------|------------|-----|-------------|-----|--------------------------------------------------------|-------------|-------------|--|
| Succinate:ubiquinone oxidoreductase (SQR, Complex II), chicken, 1yq3 |            |     |             |     |                                                        |             |             |  |
| -5.7                                                                 | Chl        | OH  | Tyr73 [D3]  | OH  | Tyr73 [D3]                                             |             |             |  |
|                                                                      | Tyr73 [D3] | OH  | Chl         | OH  |                                                        |             |             |  |
| Succinate:ubiquinone oxidoreductase (SQR, Complex II), worm, 3vr8    |            |     |             |     |                                                        |             |             |  |
| -7.2                                                                 | Chl        | OH  | Thr132 [C2] | OG1 | Ile128 [C2]                                            | Ala129 [C2] | Thr132 [C2] |  |
| -6.4                                                                 | Chl        | OH  | Thr85 [C1]  | OG1 | Ala81 [C1]                                             | Thr85 [C1]  |             |  |
|                                                                      | Thr85 [C1] | OG1 | Chl         | OH  |                                                        |             |             |  |
| -6.0                                                                 | Chl        | OH  | Ile123 [C2] | O   | Ile123 [C2]                                            | Ile124 [C2] |             |  |
|                                                                      | Chl        | OH  | Ile124 [C2] | O   |                                                        |             |             |  |

#### Electron Transport Chain Complex III (Cytochrome bc1)

|                                                                      |            |    |             |     |             |             |             |            |
|----------------------------------------------------------------------|------------|----|-------------|-----|-------------|-------------|-------------|------------|
| Cytochrome bc1, bovine heart, 1bgy                                   |            |    |             |     |             |             |             |            |
| -9.6                                                                 | Chl        | OH | Tyr358 [C8] | OH  | Ser297 [C6] | Tyr358 [C8] |             |            |
| -8.1                                                                 | Ser34 [K1] | OG | Chl         | OH  | Val25 [J1]  | Ala28 [J1]  | Leu29 [J1]  | Ser34 [K1] |
| -7.8                                                                 | Chl        | OH | Thr334 [C7] | OG1 | Ala330 [C7] | Asp331 [C7] | Thr334 [C7] |            |
| Cytochrome bc1, bovine heart, [subunits renamed to match 1bgy], 1pp9 |            |    |             |     |             |             |             |            |
| -7.5                                                                 | Chl        | OH | Asp331 [C7] | OD1 | Ala330 [C7] | Asp331 [C7] | Thr334 [C7] |            |
| -7.2                                                                 | Chl        | OH | Tyr358 [C8] | OH  | Ser297 [C6] | Tyr358 [C8] |             |            |
| -7.1                                                                 | Chl        | OH | Thr42 [E1]  | OG1 | Thr42 [E1]  |             |             |            |
| Cytochrome bc1, bovine heart, [subunits renamed to match 1bgy], 5nmi |            |    |             |     |             |             |             |            |
| -8.0                                                                 | Chl        | OH | Ser34 [K1]  | OG  | Gly31 [K1]  | Ser34 [K1]  | Ala35 [K1]  |            |
|                                                                      | Ser34 [K1] | OG | Chl         | OH  |             |             |             |            |
| Cytochrome bc1, with inhibitor, bovine heart, 2fyu                   |            |    |             |     |             |             |             |            |
| -8.8                                                                 | Chl        | OH | Tyr358 [C8] | OH  | Ser297 [C6] | Tyr358 [C8] |             |            |
| -7.9                                                                 | Chl        | OH | Asp331 [C7] | OD2 | Ala330 [C7] | Asp331 [C7] | Thr334 [C7] |            |
| Cytochrome bc1, bovine heart, [subunits renamed to match 1bgy], 1ntm |            |    |             |     |             |             |             |            |
| -8.6                                                                 | Chl        | OH | Tyr358 [C8] | OH  | Ser297 [C6] | Ile298 [C6] | Tyr358 [C8] |            |
| Cytochrome bc1, bovine heart, [subunits renamed to match 1bgy], 1l0l |            |    |             |     |             |             |             |            |
| -9.0                                                                 | Chl        | OH | Tyr358 [C8] | OH  | Ser297 [C6] | Leu301 [C6] | Tyr358 [C8] |            |
| -8.0                                                                 | Chl        | OH | Asp331 [C7] | OD1 | Ala330 [C7] | Asp331 [C7] | Thr334 [C7] |            |
| -8.0                                                                 | Chl        | OH | Thr44 [E1]  | OG1 | Thr44 [E1]  | Ala48 [E1]  |             |            |
| Cytochrome bc1, human, [subunits renamed to match 1bgy], 5xte        |            |    |             |     |             |             |             |            |
| -8.1                                                                 | Chl        | OH | Ala126 [E1] | O   | Ala126 [E1] | Lys130 [E1] |             |            |
| -6.9                                                                 | Chl        | OH | Ser238 [C5] | OG  | Leu234 [C5] | Phe235 [C5] | Ser238 [C5] |            |

#### Electron Transport Chain Complex IV (Cytochrome c Oxidase)

|                                                                             |     |    |             |     |             |             |            |  |
|-----------------------------------------------------------------------------|-----|----|-------------|-----|-------------|-------------|------------|--|
| Cytochrome c oxidase, fully oxidised, [early structure], bovine heart, 1occ |     |    |             |     |             |             |            |  |
| -7.2                                                                        | Chl | OH | Ser27 [G1]  | OG  | Leu23 [G1]  | Ala24 [G1]  | Ser27 [G1] |  |
| -7.1                                                                        | Chl | OH | His151 [A4] | ND1 | His151 [A4] | Thr207 [A5] |            |  |
| -7.0                                                                        | Chl | OH | Thr48 [C2]  | OG1 | Met44 [C2]  | Thr48 [C2]  |            |  |
| -6.9                                                                        | Chl | OH | Thr95 [C3]  | OG1 | Val91 [C3]  | Thr95 [C3]  |            |  |

| E <sup>1</sup>                                                    | Donor |    | Acceptor    |     | Local Residues (within 3 Å of a cholesterol –OH group) |             |             |             |
|-------------------------------------------------------------------|-------|----|-------------|-----|--------------------------------------------------------|-------------|-------------|-------------|
| Cytochrome c oxidase, fully oxidised, bovine heart, 1v54          |       |    |             |     |                                                        |             |             |             |
| -8.5                                                              | Chl   | OH | Ser89 [C3]  | OG  | Ser89 [C3]                                             | Glu90 [C3]  |             |             |
| -7.6                                                              | Chl   | OH | Thr174 [C5] | OG1 | Gly170 [C5]                                            | Val171 [C5] | Thr174 [C5] | Ser212 [C6] |
| -7.3                                                              | Chl   | OH | Thr48 [C2]  | OG1 | Met44 [C2]                                             | Thr48 [C2]  |             |             |
| -7.2                                                              | Chl   | OH | Ser28 [I1]  | OG  | Ala24 [I1]                                             | Ser28 [I1]  |             |             |
| Cytochrome c oxidase, fully reduced, bovine heart, 1v55           |       |    |             |     |                                                        |             |             |             |
| -8.4                                                              | Chl   | OH | Ser89 [C3]  | OG  | Ser89 [C3]                                             |             |             |             |
| -7.8                                                              | Chl   | OH | Ser212 [C6] | OG  | Gly170 [C5]                                            | Thr174 [C5] | Ser212 [C6] |             |
|                                                                   | Chl   | OH | Thr174 [C5] | OG1 |                                                        |             |             |             |
| -7.4                                                              | Chl   | OH | Thr48 [C2]  | OG1 | Met44 [C2]                                             | Leu47 [C2]  | Thr48 [C2]  |             |
| -7.2                                                              | Chl   | OH | Ser27 [G1]  | OG  | Leu23 [G1]                                             | Ala24 [G1]  | Ser27 [G1]  |             |
| Cytochrome c oxidase, with bound cyanide, bovine heart, 3x2q      |       |    |             |     |                                                        |             |             |             |
| -8.3                                                              | Chl   | OH | Ser89 [C3]  | OG  | Ser89 [C3]                                             | Glu90 [C3]  |             |             |
| -7.2                                                              | Chl   | OH | Thr48 [C2]  | OG1 | Met44 [C2]                                             | Thr48 [C2]  |             |             |
| -7.2                                                              | Chl   | OH | Ser212 [C6] | OG  | Gly170 [C5]                                            | Thr174 [C5] | Ser212 [C6] |             |
|                                                                   | Chl   | OH | Thr174 [C5] | OG1 |                                                        |             |             |             |
| -7.0                                                              | Chl   | OH | Ser28 [I1]  | OG  | Ala24 [I1]                                             | Ser28 [I1]  |             |             |
| -7.0                                                              | Chl   | OH | Ser27 [G1]  | OG  | Leu23 [G1]                                             | Ala24 [G1]  | Ser27 [G1]  |             |
| Cytochrome c oxidase, with bound cytochrome c, bovine heart, 5iy5 |       |    |             |     |                                                        |             |             |             |
| -8.8                                                              | Chl   | OH | Ser89 [C3]  | OG  | Ser89 [C3]                                             |             |             |             |
| -7.8                                                              | Chl   | OH | Ser212 [C6] | OG  | Gly170 [C5]                                            | Thr174 [C5] | Ser212 [C6] |             |
|                                                                   | Chl   | OH | Thr174 [C5] | OG1 |                                                        |             |             |             |
| -7.2                                                              | Chl   | OH | Thr48 [C2]  | OG1 | Met44 [C2]                                             | Leu47 [C2]  | Thr48 [C2]  |             |
| Cytochrome c oxidase, at neutral pH, bovine heart, 5xdq           |       |    |             |     |                                                        |             |             |             |
| -8.6                                                              | Chl   | OH | Ser89 [C3]  | OG  | Ser89 [C3]                                             |             |             |             |
| -8.2                                                              | Chl   | OH | Ser212 [C6] | OG  | Gly170 [C5]                                            | Thr174 [C5] | Ser212 [C6] |             |
|                                                                   | Chl   | OH | Thr174 [C5] | OG1 |                                                        |             |             |             |
| -7.6                                                              | Chl   | OH | Thr48 [C2]  | OG1 | Met44 [C2]                                             | Thr48 [C2]  |             |             |

1. kcal mol<sup>-1</sup>, with molar concentration units.

**TABLE S5 Residues interacting with cholesterol in more than two members of the Class A GPCRs**

| No. <sup>1</sup> | Residue       | GPCR                                                                            |
|------------------|---------------|---------------------------------------------------------------------------------|
| 1.43             | Ser           | mAChR M1, M2, M4                                                                |
| 2.54             | Ser, Gly      | 5HT <sub>1B</sub> , A <sub>2a</sub> , mAChR M3                                  |
| 2.55             | Val, Ser, Leu | A <sub>2a</sub> , Opioid $\mu$ , P2Y <sub>12</sub>                              |
| 3.34             | Tyr           | NOP, Opioid $\delta$ , $\kappa$ , $\mu$                                         |
| 5.46 + 5.461     | Ala, Cys, Val | 5HT <sub>1B</sub> , A <sub>2a</sub> , $\beta$ <sub>2</sub> AR, mAChR M1, M3, M4 |
| 6.46 + 6.461     | Ala, Leu, Phe | CXC4, FFAR1, AT1                                                                |
| 6.47             | Cys, Ser      | CXC4, P2Y <sub>1</sub> , AT1                                                    |
| 7.47             | Gly, Thr, Ser | $\beta$ <sub>2</sub> AR, CB <sub>1</sub> , Opioid $\delta$ , $\kappa$           |

1. Residue number in the Ballesteros-Weinstein numbering system (1).

#### SUPPORTING REFERENCES

1. Ballesteros, J. A., and H. Weinstein. 1995. Integrated methods for the construction of three-dimensional models and computational probing of structure-function relations in G protein-coupled receptors. In *Methods in Neurosciences Vol. 25*. C. S. Stuart, editor. Academic Press, San Diego. 366-428.
2. Wootten, D., J. Simms, L. J. Miller, A. Christopoulos, and P. M. Sexton. 2013. Polar transmembrane interactions drive formation of ligand-specific and signal pathway-biased family B G protein-coupled receptor conformations. *Proc. Natl. Acad. Sci. USA* 110:5211-5216.
3. Pin, J.-P., T. Galvez, and L. Prézéau. 2003. Evolution, structure, and activation mechanism of family 3/C G-protein-coupled receptors. *Pharmacology & Therapeutics* 98:325-354.
4. Wang, C., H. Wu, T. Evron, E. Vardy, G. W. Han, X.-P. Huang, S. J. Hufeisen, T. J. Mangano, D. J. Urban, V. Katritch, V. Cherezov, M. G. Caron, B. L. Roth, and R. C. Stevens. 2014. Structural basis for Smoothed receptor modulation and chemoresistance to anticancer drugs. *Nature Comm.* 5:4355.
